# Supplementary material for: De novo Assembly of Leaf Transcriptome in the Medicinal Plant Andrographis paniculata
Source: Front Plant Sci. 2016 Aug 17;7:1203. doi: 10.3389/fpls.2016.01203 (PMC4987368; doi:10.3389/fpls.2016.01203)
Supplement: Supplementary File S4 — Description of KOG mapped transcripts with their corresponding enzyme codes. [file Table4.xlsx]

## Sheet: KOG
Supplementary File S4. Description of KOG mapped transcripts with their corresponding enzyme codes.
KO_ID	Abbr	Title	EC Number	Number of Unigenes
K13412	CPK	calcium-dependent protein kinase	EC:2.7.11.1	60
K05658	ABCB1	ATP-binding cassette, subfamily B (MDR/TAP), member 1	EC:3.6.3.44	54
K01535	E3.6.3.6	H+-transporting ATPase	EC:3.6.3.6	53
K01728	pel	pectate lyase	EC:4.2.2.2	39
K05391	CNGF	cyclic nucleotide gated channel, other eukaryote		38
K01115	PLD1_2	phospholipase D1/2	EC:3.1.4.4	37
K00430	E1.11.1.7	peroxidase	EC:1.11.1.7	35
K01051	E3.1.1.11	pectinesterase	EC:3.1.1.11	35
K15397	KCS	3-ketoacyl-CoA synthase	EC:2.3.1.199	31
K13648	GAUT	alpha-1,4-galacturonosyltransferase	EC:2.4.1.43	28
K14487	GH3	auxin responsive GH3 gene family		27
K04392	RAC1	Ras-related C3 botulinum toxin substrate 1		26
K00001	adh	alcohol dehydrogenase	EC:1.1.1.1	25
K09587	CYP90B1, DWF4	steroid 22-alpha-hydroxylase	EC:1.14.13.-	24
K03639	MOCS1, moaA	cyclic pyranopterin phosphate synthase	EC:4.1.99.18	24
K13448	CML	calcium-binding protein CML		24
K16055	TPS	trehalose 6-phosphate synthase/phosphatase	EC:2.4.1.15 3.1.3.12	22
K00889	PIP5K	1-phosphatidylinositol-4-phosphate 5-kinase	EC:2.7.1.68	22
K14494	DELLA	DELLA protein		22
K01897	ACSL, fadD	long-chain acyl-CoA synthetase	EC:6.2.1.3	19
K06617	E2.4.1.82	raffinose synthase	EC:2.4.1.82	18
K01087	otsB	trehalose 6-phosphate phosphatase	EC:3.1.3.12	18
K07466	RFA1, RPA1, rpa	replication factor A1		18
K14484	IAA	auxin-responsive protein IAA		18
K14432	ABF	ABA responsive element binding factor		18
K00454	LOX2S	lipoxygenase	EC:1.13.11.12	17
K00276	AOC3, AOC2, tynA	primary-amine oxidase	EC:1.4.3.21	17
K01662	dxs	1-deoxy-D-xylulose-5-phosphate synthase	EC:2.2.1.7	17
K09458	fabF	3-oxoacyl-[acyl-carrier-protein synthase II	EC:2.3.1.179	17
K00921	PIKFYV FAB1	1-phosphatidylinositol-3-phosphate 5-kinase	EC:2.7.1.150	17
K01762	ACS	1-aminocyclopropane-1-carboxylate synthase	EC:4.4.1.14	17
K14496	PYL	abscisic acid receptor PYR/PYL family		17
K00128	E1.2.1.3	aldehyde dehydrogenase (NAD+)	EC:1.2.1.3	16
K00279	CKX	cytokinin dehydrogenase	EC:1.5.99.12	16
K00549	metE	5-methyltetrahydropteroyltriglutamate--homocysteine methyltransferase	EC:2.1.1.14	16
K14497	PP2C	protein phosphatase 2C	EC:3.1.3.16	16
K01188	E3.2.1.21	beta-glucosidase	EC:3.2.1.21	16
K14652	ribBA	3,4-dihydroxy 2-butanone 4-phosphate synthase / GTP cyclohydrolase II	EC:4.1.99.12 3.5.4.25	16
K14488	SAUR	SAUR family protein		16
K14572	MDN1, REA1	midasin		16
K00695	E2.4.1.13	sucrose synthase	EC:2.4.1.13	15
K00826	ilvE	branched-chain amino acid aminotransferase	EC:2.6.1.42	15
K14498	SNRK2	serine/threonine-protein kinase SRK2	EC:2.7.11.1	15
K14431	TGA	transcription factor TGA		15
K12486	SMAP	stromal membrane-associated protein		15
K03283	HSPA1_8	heat shock 70kDa protein 1/8		15
K05280	E1.14.13.21	flavonoid 3'-monooxygenase	EC:1.14.13.21	14
K00799	GST, gst	glutathione S-transferase	EC:2.5.1.18	14
K00873	PK, pyk	pyruvate kinase	EC:2.7.1.40	14
K00888	PI4K	phosphatidylinositol 4-kinase	EC:2.7.1.67	14
K01904	4CL	4-coumarate--CoA ligase	EC:6.2.1.12	14
K01930	FPGS	folylpolyglutamate synthase	EC:6.3.2.17	14
K11584	PPP2R5	serine/threonine-protein phosphatase 2A regulatory subunit B'		14
K12619	XRN2, RAT1	5'-3' exoribonuclease 2	EC:3.1.13.-	13
K10581	UBE2O	ubiquitin-conjugating enzyme E2 O	EC:6.3.2.19	13
K13126	PABPC	polyadenylate-binding protein		13
K12489	ACAP	Arf-GAP with coiled-coil, ANK repeat and PH domain-containing protein		13
K00434	E1.11.1.11	L-ascorbate peroxidase	EC:1.11.1.11	12
K11420	EHMT	euchromatic histone-lysine N-methyltransferase	EC:2.1.1.43	12
K00696	E2.4.1.14	sucrose-phosphate synthase	EC:2.4.1.14	12
K12373	HEXA_B	hexosaminidase	EC:3.2.1.52	12
K01937	pyrG, CTPS	CTP synthase	EC:6.3.4.2	12
K00763	pncB, NAPRT1	nicotinate phosphoribosyltransferase	EC:6.3.4.21	12
K01950	NADSYN1, QNS1, nadE	NAD+ synthase (glutamine-hydrolysing)	EC:6.3.5.1	12
K07904	RAB11A	Ras-related protein Rab-11A		12
K14486	K14486, ARF	auxin response factor		12
K09840	NCED	9-cis-epoxycarotenoid dioxygenase	EC:1.13.11.51	11
K09843	E1.14.13.93	(+)-abscisic acid 8'-hydroxylase	EC:1.14.13.93	11
K13356	FAR	fatty acyl-CoA reductase	EC:1.2.1.-	11
K01738	cysK	cysteine synthase A	EC:2.5.1.47	11
K00850	pfkA, PFK	6-phosphofructokinase 1	EC:2.7.1.11	11
K05350	bglB	beta-glucosidase	EC:3.2.1.21	11
K01583	E4.1.1.19	arginine decarboxylase	EC:4.1.1.19	11
K01792	E5.1.3.15	glucose-6-phosphate 1-epimerase	EC:5.1.3.15	11
K13993	HSP20	HSP20 family protein		11
K04077	gro HSPD1	chaperonin GroEL		11
K03921	DESA1	acyl-[acyl-carrier-protein desaturase	EC:1.14.19.2	10
K00789	metK	S-adenosylmethionine synthetase	EC:2.5.1.6	10
K00844	HK	hexokinase	EC:2.7.1.1	10
K00972	UAP1	UDP-N-acetylglucosamine pyrophosphorylase	EC:2.7.7.23	10
K03841	FBP, fbp	fructose-1,6-bisphosphatase I	EC:3.1.3.11	10
K04382	PPP2C	serine/threonine-protein phosphatase 2A catalytic subunit	EC:3.1.3.16	10
K01114	plcC	phospholipase C	EC:3.1.4.3	10
K01193	sacA	beta-fructofuranosidase	EC:3.2.1.26	10
K01610	pckA	phosphoenolpyruvate carboxykinase (ATP)	EC:4.1.1.49	10
K10527	MFP2	enoyl-CoA hydratase/3-hydroxyacyl-CoA dehydrogenase	EC:4.2.1.17 1.1.1.35 1.1.1.211	10
K12448	UXE	UDP-arabinose 4-epimerase	EC:5.1.3.5	10
K08679	E5.1.3.6	UDP-glucuronate 4-epimerase	EC:5.1.3.6	10
K12837	U2AF2	splicing factor U2AF 65 kDa subunit		10
K08486	STX1B_2_3	syntaxin 1B/2/3		10
K13457	RPM1, RPS3	disease resistance protein RPM1		10
K14508	NPR1	regulatory protein NPR1		10
K12471	EPN	epsin		10
K15718	LOX1_5	linoleate 9S-lipoxygenase	EC:1.13.11.58	9
K15639	CYP734A1, BAS1	PHYB activation tagged suppressor 1	EC:1.14.-.-	9
K00472	E1.14.11.2	prolyl 4-hydroxylase	EC:1.14.11.2	9
K00232	ACOX1, ACOX3	acyl-CoA oxidase	EC:1.3.3.6	9
K08247	E2.1.1.12	methionine S-methyltransferase	EC:2.1.1.12	9
K00600	glyA, SHMT	glycine hydroxymethyltransferase	EC:2.1.2.1	9
K01648	ACLY	ATP citrate (pro-S)-lyase	EC:2.3.3.8	9
K05310	GPI7	ethanolaminephosphotransferase	EC:2.7.-.-	9
K00901	DGK, dgkA	diacylglycerol kinase (ATP dependent)	EC:2.7.1.107	9
K01507	ppa	inorganic pyrophosphatase	EC:3.6.1.1	9
K14442	DHX36, RHAU	ATP-dependent RNA helicase DHX36	EC:3.6.4.13	9
K12823	DDX5, DBP2	ATP-dependent RNA helicase DDX5/DBP2	EC:3.6.4.13	9
K01580	gadB, gadA, GAD	glutamate decarboxylase	EC:4.1.1.15	9
K01611	sp AMD1	S-adenosylmethionine decarboxylase	EC:4.1.1.50	9
K01623	ALDO	fructose-bisphosphate aldolase, class I	EC:4.1.2.13	9
K01874	MARS, metG	methionyl-tRNA synthetase	EC:6.1.1.10	9
K12130	PRR5	pseudo-response regulator 5		9
K10842	MNAT1	CDK-activating kinase assembly factor MAT1		9
K14514	EIN3	ethylene-insensitive protein 3		9
K03254	EIF3A	translation initiation factor 3 subunit A		9
K12616	EDC4	enhancer of mRNA-decapping protein 4		9
K13946	AUX1, LAX	auxin influx carrier (AUX1 LAX family)		9
K14491	ARR-B	two-component response regulator ARR-B family		9
K10798	PARP	poly ADP-ribose polymerase	EC:2.4.2.30	8
K00121	frmA, ADH5, adhC	S-(hydroxymethyl)glutathione dehydrogenase / alcohol dehydrogenase	EC:1.1.1.284 1.1.1.1	8
K04125	E1.14.11.13	gibberellin 2-oxidase	EC:1.14.11.13	8
K05933	E1.14.17.4	aminocyclopropanecarboxylate oxidase	EC:1.14.17.4	8
K00164	OGDH, sucA	2-oxoglutarate dehydrogenase E1 component	EC:1.2.4.2	8
K13508	GPAT	glycerol-3-phosphate acyltransferase	EC:2.3.1.15	8
K00700	glgB	1,4-alpha-glucan branching enzyme	EC:2.4.1.18	8
K13789	GGPS	geranylgeranyl diphosphate synthase, type II	EC:2.5.1.1 2.5.1.10 2.5.1.29	8
K00981	CDS1, CDS2, cdsA	phosphatidate cytidylyltransferase	EC:2.7.7.41	8
K00566	mnmA, trmU, TRMU	tRNA-specific 2-thiouridylase	EC:2.8.1.-	8
K01231	MAN2	alpha-mannosidase II	EC:3.2.1.114	8
K07407	galA, rafA	alpha-galactosidase	EC:3.2.1.22	8
K12309	GLB1, ELNR1	beta-galactosidase	EC:3.2.1.23	8
K01191	E3.2.1.24	alpha-mannosidase	EC:3.2.1.24	8
K10875	RAD54L, RAD54	DNA repair and recombination protein RAD54 and RAD54-like protein	EC:3.6.4.-	8
K07953	SAR1	GTP-binding protein SAR1	EC:3.6.5.-	8
K08248	E4.1.2.10	mandelonitrile lyase	EC:4.1.2.10	8
K01754	ilvA, tdcB	threonine dehydratase	EC:4.3.1.19	8
K09580	PDIA1, P4HB	protein disulfide-isomerase A1	EC:5.3.4.1	8
K04120	E5.5.1.13	ent-copalyl diphosphate synthase	EC:5.5.1.13	8
K10666	RNF5	E3 ubiquitin-protein ligase RNF5	EC:6.3.2.19	8
K13354	SLC25A17, PMP34	solute carrier family 25 (peroxisomal adenine nucleotide transporter), member 17		8
K09540	SEC63	translocation protein SEC63		8
K11583	PPP2R3	serine/threonine-protein phosphatase 2A regulatory subunit B''		8
K04354	PPP2R2	serine/threonine-protein phosphatase 2A regulatory subunit B		8
K04646	CLTC	clathrin heavy chain		8
K00083	E1.1.1.195	cinnamyl-alcohol dehydrogenase	EC:1.1.1.195	7
K03781	kat CAT, catB, srpA	catalase	EC:1.11.1.6	7
K00654	E2.3.1.50	serine palmitoyltransferase	EC:2.3.1.50	7
K01638	ac glcB	malate synthase	EC:2.3.3.9	7
K00797	sp SRM	spermidine synthase	EC:2.5.1.16	7
K13416	BAK1	brassinosteroid insensitive 1-associated receptor kinase 1	EC:2.7.10.1 2.7.11.1	7
K14500	BSK	BR-signaling kinase	EC:2.7.11.1	7
K14489	AHK2_3_4	arabidopsis histidine kinase 2/3/4 (cytokinin receptor)	EC:2.7.13.3	7
K12657	ALDH18A1, P5CS	delta-1-pyrroline-5-carboxylate synthetase	EC:2.7.2.11 1.2.1.41	7
K00938	mvaK2	phosphomevalonate kinase	EC:2.7.4.2	7
K00966	GMPP	mannose-1-phosphate guanylyltransferase	EC:2.7.7.13	7
K13917	RNGTT	mRNA-capping enzyme	EC:2.7.7.50 3.1.3.33	7
K01110	PTEN	phosphatidylinositol-3,4,5-trisphosphate 3-phosphatase and dual-specificity protein phosphatase PTEN	EC:3.1.3.16 3.1.3.48 3.1.3.67	7
K17108	GBA2	non-lysosomal glucosylceramidase	EC:3.2.1.45	7
K01205	NAGLU	alpha-N-acetylglucosaminidase	EC:3.2.1.50	7
K01568	pdc	pyruvate decarboxylase	EC:4.1.1.1	7
K01953	asnB, ASNS	asparagine synthase (glutamine-hydrolysing)	EC:6.3.5.4	7
K03124	TFIIB, GTF2B, SUA7, tfb	transcription initiation factor TFIIB		7
K03131	TAF6	transcription initiation factor TFIID subunit 6		7
K12830	SF3B3, SAP130, RSE1	splicing factor 3B subunit 3		7
K10756	RFC3_5	replication factor C subunit 3/5		7
K12605	CNOT2, NOT2	CCR4-NOT transcription complex subunit 2		7
K13429	CERK1	chitin elicitor receptor kinase 1		7
K02183	CALM	calmodulin		7
K02154	ATP ATP6N	V-type H+-transporting ATPase subunit a		7
K00021	HMGCR	hydroxymethylglutaryl-CoA reductase (NADPH)	EC:1.1.1.34	6
K15402	CYP86B1	fatty acid omega-hydroxylase	EC:1.14.-.-	6
K15398	CYP86A4S	fatty acid omega-hydroxylase	EC:1.14.-.-	6
K12355	REF1	coniferyl-aldehyde dehydrogenase	EC:1.2.1.68	6
K00130	b gbsA	betaine-aldehyde dehydrogenase	EC:1.2.1.8	6
K00162	PDHB, pdhB	pyruvate dehydrogenase E1 component beta subunit	EC:1.2.4.1	6
K12259	SMOX, PAO5	spermine oxidase	EC:1.5.3.16 1.5.3.-	6
K03801	lipB	lipoyl(octanoyl) transferase	EC:2.3.1.181	6
K00640	cysE	serine O-acetyltransferase	EC:2.3.1.30	6
K13523	AGPAT3_4	lysophosphatidic acid acyltransferase / lysophosphatidylinositol acyltransferase	EC:2.3.1.51 2.3.1.-	6
K00787	FDPS	farnesyl diphosphate synthase	EC:2.5.1.1 2.5.1.10	6
K00801	FDFT1	farnesyl-diphosphate farnesyltransferase	EC:2.5.1.21	6
K00820	glmS, GFPT	glucosamine--fructose-6-phosphate aminotransferase (isomerizing)	EC:2.6.1.16	6
K01103	PFKFB	6-phosphofructo-2-kinase / fructose-2,6-bisphosphatase	EC:2.7.1.105 3.1.3.46	6
K00849	galK	galactokinase	EC:2.7.1.6	6
K04718	SPHK	sphingosine kinase	EC:2.7.1.91	6
K13430	PBS1	serine/threonine-protein kinase PBS1	EC:2.7.11.1	6
K14509	ERS	ethylene receptor	EC:2.7.13.-	6
K00975	glgC	glucose-1-phosphate adenylyltransferase	EC:2.7.7.27	6
K15728	LPIN	phosphatidate phosphatase LPIN	EC:3.1.3.4	6
K03787	surE	5'-nucleotidase	EC:3.1.3.5	6
K01456	NGLY1, PNG1	peptide-N4-(N-acetyl-beta-glucosaminyl)asparagine amidase	EC:3.5.1.52	6
K02133	ATP ATP5B, ATP2	F-type H+-transporting ATPase subunit beta	EC:3.6.3.14	6
K02542	MCM6	DNA replication licensing factor MCM6	EC:3.6.4.12	6
K02209	MCM5, CDC46	DNA replication licensing factor MCM5	EC:3.6.4.12	6
K10901	BLM, R SGS1	bloom syndrome protein	EC:3.6.4.12	6
K01689	eno	enolase	EC:4.2.1.11	6
K10703	PHS1, PAS2	very-long-chain (3R)-3-hydroxyacyl-[acyl-carrier protein dehydratase	EC:4.2.1.134	6
K05607	AUH	methylglutaconyl-CoA hydratase	EC:4.2.1.18	6
K01696	trpB	tryptophan synthase beta chain	EC:4.2.1.20	6
K01784	gal GALE	UDP-glucose 4-epimerase	EC:5.1.3.2	6
K06689	UB UBC4, UBC5	ubiquitin-conjugating enzyme E2 D/E	EC:6.3.2.19	6
K01942	HLCS	biotin--protein ligase	EC:6.3.4.9 6.3.4.10 6.3.4.11 6.3.4.15	6
K13525	VCP, CDC48	transitional endoplasmic reticulum ATPase		6
K07375	TUBB	tubulin beta		6
K12890	SFRS1_9	splicing factor, arginine/serine-rich 1/9		6
K12121	PHYB	phytochrome B		6
K14411	MSI	RNA-binding protein Musashi		6
K08737	MSH6	DNA mismatch repair protein MSH6		6
K14293	KPNB1	importin subunit beta-1		6
K03231	EEF1A	elongation factor 1-alpha		6
K03347	CUL1, CDC53	cullin 1		6
K03115	CSNK2B	casein kinase II subunit beta		6
K12581	CNOT7_8, CAF1, POP2	CCR4-NOT transcription complex subunit 7/8		6
K02144	ATPeV1H	V-type H+-transporting ATPase subunit H		6
K14492	ARR-A	two-component response regulator ARR-A family		6
K03348	APC1	anaphase-promoting complex subunit 1		6
K00059	fabG	3-oxoacyl-[acyl-carrier protein reductase	EC:1.1.1.100	5
K08081	TR1	Tropinone reductase 1	EC:1.1.1.206	5
K00012	UGDH, ugd	UDPglucose 6-dehydrogenase	EC:1.1.1.22	5
K00026	MDH2	malate dehydrogenase	EC:1.1.1.37	5
K00036	G6PD, zwf	glucose-6-phosphate 1-dehydrogenase	EC:1.1.1.49	5
K09839	VD NPQ1	violaxanthin de-epoxidase	EC:1.10.99.3	5
K10712	ADO	cysteamine dioxygenase	EC:1.13.11.19	5
K15401	CYP86A1	fatty acid omega-hydroxylase	EC:1.14.-.-	5
K12639	CYP724B1, D11	cytochrome P450, family 724, subfamily B, polypeptide 1	EC:1.14.13.-	5
K14423	SMO1	4,4-dimethyl-9beta,19-cyclopropylsterol-4alpha-methyl oxidase	EC:1.14.13.72	5
K00294	E1.2.1.88	1-pyrroline-5-carboxylate dehydrogenase	EC:1.2.1.88	5
K00161	PDHA, pdhA	pyruvate dehydrogenase E1 component alpha subunit	EC:1.2.4.1	5
K00295	MTD1	methylenetetrahydrofolate dehydrogenase (NAD+)	EC:1.5.1.15	5
K14157	AASS	alpha-aminoadipic semialdehyde synthase	EC:1.5.1.8 1.5.1.9	5
K00616	talA, talB	transaldolase	EC:2.2.1.2	5
K00679	E2.3.1.158	phospholipid:diacylglycerol acyltransferase	EC:2.3.1.158	5
K10532	HGSNAT	heparan-alpha-glucosaminide N-acetyltransferase	EC:2.3.1.78	5
K01641	E2.3.3.10	hydroxymethylglutaryl-CoA synthase	EC:2.3.3.10	5
K00688	glgP, PYG	starch phosphorylase	EC:2.4.1.1	5
K00737	MGAT3	beta-1,4-mannosyl-glycoprotein beta-1,4-N-acetylglucosaminyltransferase	EC:2.4.1.144	5
K03691	POFUT	peptide-O-fucosyltransferase	EC:2.4.1.221	5
K03847	ALG12	alpha-1,6-mannosyltransferase	EC:2.4.1.260	5
K05954	FNTB	protein farnesyltransferase subunit beta	EC:2.5.1.58	5
K15849	PAT, AAT	bifunctional aspartate aminotransferase and glutamate/aspartate-prephenate aminotransferase	EC:2.6.1.1 2.6.1.78 2.6.1.79	5
K00913	ITPK1	inositol-1,3,4-trisphosphate 5/6-kinase / inositol-tetrakisphosphate 1-kinase	EC:2.7.1.159 2.7.1.134	5
K00866	CKI1	choline kinase	EC:2.7.1.32	5
K12446	E2.7.1.46	L-arabinokinase	EC:2.7.1.46	5
K00876	udk, UCK	uridine kinase	EC:2.7.1.48	5
K13415	BRI1	protein brassinosteroid insensitive 1	EC:2.7.10.1 2.7.11.1	5
K08269	ULK1_2_3, ATG1	serine/threonine-protein kinase ULK/ATG1	EC:2.7.11.1	5
K14510	CTR1	serine/threonine-protein kinase CTR1	EC:2.7.11.1	5
K06210	NMNAT	nicotinamide mononucleotide adenylyltransferase	EC:2.7.7.1 2.7.7.18	5
K03635	MOCS2, moaE	molybdopterin synthase catalytic subunit	EC:2.8.1.12	5
K14570	R R RNH70	RNA exonuclease 1	EC:3.1.-.-	5
K01082	cysQ, M BPNT1	3'(2'), 5'-bisphosphate nucleotidase	EC:3.1.3.7	5
K10563	mutM, fpg	formamidopyrimidine-DNA glycosylase	EC:3.2.2.23 4.2.99.18	5
K01307	GGH	gamma-glutamyl hydrolase	EC:3.4.19.9	5
K01633	folB	dihydroneopterin aldolase	EC:4.1.2.25	5
K01657	trpE	anthranilate synthase component I	EC:4.1.3.27	5
K03147	thiC	phosphomethylpyrimidine synthase	EC:4.1.99.17	5
K01674	cah	carbonic anhydrase	EC:4.2.1.1	5
K09584	PDIA6, TXNDC7	protein disulfide-isomerase A6	EC:5.3.4.1	5
K03165	TOP3	DNA topoisomerase III	EC:5.99.1.2	5
K10588	UBE3B	ubiquitin-protein ligase E3 B	EC:6.3.2.19	5
K10144	RCHY1, PIRH2	RING finger and CHY zinc finger domain-containing protein 1	EC:6.3.2.19	5
K14005	SEC31	protein transport protein SEC31		5
K14007	SEC24	protein transport protein SEC24		5
K14006	SEC23	protein transport protein SEC23		5
K06316	RFT1	oligosaccharide translocation protein RFT1		5
K12606	RCD1, CNOT9, CAF40	CCR4-NOT transcription complex subunit 9		5
K10839	RAD23, HR23	UV excision repair protein RAD23		5
K07897	RAB7A	Ras-related protein Rab-7A		5
K12617	PATL1, PAT1	DNA topoisomerase 2-associated protein PAT1		5
K12666	OST1, RPN1	oligosaccharyltransferase complex subunit alpha (ribophorin I)		5
K14314	NUP210, GP210	nuclear pore complex protein Nup210		5
K13348	MPV17	protein Mpv17		5
K13464	JAZ	jasmonate ZIM domain-containing protein		5
K03257	EIF4A	translation initiation factor 4A		5
K10609	CUL4	cullin 4		5
K12869	CRN, CRNKL1, CLF1, SYF3	crooked neck		5
K10529	DOX1	alpha-dioxygenase	EC:1.-.-.-	4
K00029	maeB	malate dehydrogenase (oxaloacetate-decarboxylating)(NADP+)	EC:1.1.1.40	4
K00052	leuB	3-isopropylmalate dehydrogenase	EC:1.1.1.85	4
K00058	s PHGDH	D-3-phosphoglycerate dehydrogenase	EC:1.1.1.95	4
K00432	E1.11.1.9	glutathione peroxidase	EC:1.11.1.9	4
K09588	CYP90A1, CPD	cytochrome P450, family 90, subfamily A, polypeptide 1	EC:1.14.-.-	4
K11816	YUCCA	indole-3-pyruvate monooxygenase	EC:1.14.13.168	4
K04713	SUR2	sphinganine C4-monooxygenase	EC:1.14.13.169	4
K13427	NOA1	nitric-oxide synthase, plant	EC:1.14.13.39	4
K13029	CYP71E1	4-hydroxyphenylacetaldehyde oxime monooxygenase	EC:1.14.13.68	4
K04123	KAO	ent-kaurenoic acid hydroxylase	EC:1.14.13.79	4
K00507	SCD, desC	stearoyl-CoA desaturase (delta-9 desaturase)	EC:1.14.19.1	4
K00106	XDH	xanthine dehydrogenase/oxidase	EC:1.17.1.4 1.17.3.2	4
K14085	ALDH7A1	aldehyde dehydrogenase family 7 member A1	EC:1.2.1.31 1.2.1.8 1.2.1.3	4
K00129	E1.2.1.5	aldehyde dehydrogenase (NAD(P)+)	EC:1.2.1.5	4
K00514	ZDS, crtQ	zeta-carotene desaturase	EC:1.3.5.6	4
K00264	GLT1	glutamate synthase (NADPH/NADH)	EC:1.4.1.13 1.4.1.14	4
K13366	MPAO, PAO1	polyamine oxidase	EC:1.5.3.14 1.5.3.16 1.5.3.-	4
K00326	E1.6.2.2	cytochrome-b5 reductase	EC:1.6.2.2	4
K08232	E1.6.5.4	monodehydroascorbate reductase (NADH)	EC:1.6.5.4	4
K17398	DNMT3A	DNA (cytosine-5)-methyltransferase 3A	EC:2.1.1.37	4
K00615	tktA, tktB	transketolase	EC:2.2.1.1	4
K07513	ACAA1	acetyl-CoA acyltransferase 1	EC:2.3.1.16	4
K13519	LPT1, ALE1	lysophospholipid acyltransferase	EC:2.3.1.51 2.3.1.23 2.3.1.-	4
K00681	ggt	gamma-glutamyltranspeptidase	EC:2.3.2.2	4
K01649	leuA	2-isopropylmalate synthase	EC:2.3.3.13	4
K03842	ALG1	beta-1,4-mannosyltransferase	EC:2.4.1.142	4
K13495	CISZOG	cis-zeatin O-glucosyltransferase	EC:2.4.1.215	4
K01988	A4GALT	lactosylceramide 4-alpha-galactosyltransferase	EC:2.4.1.228	4
K03849	ALG8	alpha-1,3-glucosyltransferase	EC:2.4.1.265	4
K03715	E2.4.1.46	1,2-diacylglycerol 3-beta-galactosyltransferase	EC:2.4.1.46	4
K06611	E2.4.1.67	stachyose synthetase	EC:2.4.1.67	4
K00759	APRT, apt	adenine phosphoribosyltransferase	EC:2.4.2.7	4
K00814	GPT, ALT	alanine transaminase	EC:2.6.1.2	4
K00827	AGXT2	alanine-glyoxylate transaminase / (R)-3-amino-2-methylpropionate-pyruvate transaminase	EC:2.6.1.44 2.6.1.40	4
K00815	TAT	tyrosine aminotransferase	EC:2.6.1.5	4
K00817	hisC	histidinol-phosphate aminotransferase	EC:2.6.1.9	4
K00899	mtnK	5-methylthioribose kinase	EC:2.7.1.100	4
K00854	xylB, XYLB	xylulokinase	EC:2.7.1.17	4
K05305	FUK	fucokinase	EC:2.7.1.52	4
K00895	pfk	pyrophosphate--fructose-6-phosphate 1-phosphotransferase	EC:2.7.1.90	4
K08333	PIK3R4, VPS15	phosphoinositide-3-kinase, regulatory subunit 4	EC:2.7.11.1	4
K13414	MEKK1P	mitogen-activated protein kinase kinase kinase 1, plant	EC:2.7.11.25	4
K00927	PGK, pgk	phosphoglycerate kinase	EC:2.7.2.3	4
K00939	adk	adenylate kinase	EC:2.7.4.3	4
K00940	ndk	nucleoside-diphosphate kinase	EC:2.7.4.6	4
K13811	PAPSS	3'-phosphoadenosine 5'-phosphosulfate synthase	EC:2.7.7.4 2.7.1.25	4
K08744	CRLS	cardiolipin synthase	EC:2.7.8.-	4
K00993	EPT1	ethanolaminephosphotransferase	EC:2.7.8.1	4
K08730	PTDSS2	phosphatidylserine synthase 2	EC:2.7.8.29	4
K14674	TGL4	TAG lipase / steryl ester hydrolase / phospholipase A2 / LPA acyltransferase	EC:3.1.1.3 3.1.1.13 3.1.1.4 2.3.1.51	4
K11866	STAMBP, AMSH	STAM-binding protein	EC:3.1.2.15	4
K05605	HIBCH	3-hydroxyisobutyryl-CoA hydrolase	EC:3.1.2.4	4
K08991	MUS81	crossover junction endonuclease MUS81	EC:3.1.22.-	4
K00784	rnz	ribonuclease Z	EC:3.1.26.11	4
K05857	PLCD	phosphatidylinositol phospholipase C, delta	EC:3.1.4.11	4
K01178	E3.2.1.3	glucoamylase	EC:3.2.1.3	4
K01246	tag	DNA-3-methyladenine glycosylase I	EC:3.2.2.20	4
K01247	alkA	DNA-3-methyladenine glycosylase II	EC:3.2.2.21	4
K01251	ahcY	adenosylhomocysteinase	EC:3.3.1.1	4
K12349	ASAH2	neutral ceramidase	EC:3.5.1.23	4
K02083	allC	allantoate deiminase	EC:3.5.3.9	4
K13035	NIT4	beta-cyano-L-alanine hydratase/nitrilase	EC:3.5.5.4 4.2.1.65	4
K02145	ATP ATP6A	V-type H+-transporting ATPase subunit A	EC:3.6.3.14	4
K03654	recQ	ATP-dependent DNA helicase RecQ	EC:3.6.4.12	4
K12815	DHX38, PRP16	pre-mRNA-splicing factor ATP-dependent RNA helicase PRP16	EC:3.6.4.13	4
K12614	DDX6, RCK, DHH1	ATP-dependent RNA helicase DDX6/DHH1	EC:3.6.4.13	4
K01640	HMGCL, hmgL	hydroxymethylglutaryl-CoA lyase	EC:4.1.3.4	4
K10775	E4.3.1.24	phenylalanine ammonia-lyase	EC:4.3.1.24	4
K06215	pdxS, pdx1	pyridoxal 5'-phosphate synthase pdxS subunit	EC:4.3.3.6	4
K01761	E4.4.1.11	methionine-gamma-lyase	EC:4.4.1.11	4
K01759	GLO1, gloA	lactoylglutathione lyase	EC:4.4.1.5	4
K10046	GME	GDP-D-mannose 3', 5'-epimerase	EC:5.1.3.18 5.1.3.-	4
K15744	Z-ISO	zeta-carotene isomerase	EC:5.2.1.12	4
K01810	GPI, pgi	glucose-6-phosphate isomerase	EC:5.3.1.9	4
K15633	gpmI	2,3-bisphosphoglycerate-independent phosphoglycerate mutase	EC:5.4.2.12	4
K01853	E5.4.99.8	cycloartenol synthase	EC:5.4.99.8	4
K01893	NARS, asnS	asparaginyl-tRNA synthetase	EC:6.1.1.22	4
K10601	SYVN1, HRD1	E3 ubiquitin-protein ligase synoviolin	EC:6.3.2.19	4
K12115	ZTL	clock-associated PAS protein ZTL		4
K02358	tuf, TUFM	elongation factor Tu		4
K12127	TOC1, APRR1	pseudo-response regulator 1		4
K03127	TAF13	transcription initiation factor TFIID subunit 13		4
K03126	TAF12	transcription initiation factor TFIID subunit 12		4
K08488	STX7	syntaxin 7		4
K08490	STX5	syntaxin 5		4
K14012	SHP1, UBX1, NSFL1C	UBX domain-containing protein 1		4
K14299	SEH1	nucleoporin SEH1		4
K02964	RP-S18 RPS18	small subunit ribosomal protein S18e		4
K14319	RANGAP1	Ran GTPase-activating protein 1		4
K05293	PIGU	phosphatidylinositol glycan, class U		4
K06965	P DOM34, pelA	protein pelota		4
K14297	NUP98, ADAR2	nuclear pore complex protein Nup98-Nup96		4
K07456	mutS2	DNA mismatch repair protein MutS2		4
K04079	htpG, HSP90A	molecular chaperone HtpG		4
K09490	HSPA5, BIP	heat shock 70kDa protein 5		4
K09487	HSP90B, TRA1	heat shock protein 90kDa beta		4
K12741	HNRNPA1_3	heterogeneous nuclear ribonucleoprotein A1/A3		4
K14416	HBS1	elongation factor 1 alpha-like protein		4
K16223	FT	protein FLOWERING LOCUS T		4
K03265	ERF1	peptide chain release factor subunit 1		4
K14513	EIN2	ethylene-insensitive protein 2		4
K14515	EBF1_2	EIN3-binding F-box protein		4
K09503	DNAJA2	DnaJ homolog subfamily A member 2		4
K13989	DERL2_3	Derlin-2/3		4
K12118	CRY1	cryptochrome 1		4
K14401	CPSF1, CFT1	cleavage and polyadenylation specificity factor subunit 1		4
K12191	CHMP2A	charged multivesicular body protein 2A		4
K03363	CDC20	cell division cycle 20, cofactor of APC complex		4
K08054	CANX	calnexin		4
K08775	BRCA2, FANCD1	breast cancer 2 susceptibility protein		4
K12449	AXS	UDP-apiose/xylose synthase		4
K02155	ATP ATP6L	V-type H+-transporting ATPase 16kDa proteolipid subunit		4
K15403	AC HTH	fatty acid omega-hydroxy dehydrogenase	EC:1.1.-.-	3
K07748	NSDHL, ERG26	sterol-4alpha-carboxylate 3-dehydrogenase (decarboxylating)	EC:1.1.1.170	3
K15891	FLDH	farnesol dehydrogenase	EC:1.1.1.216	3
K17744	GalDH	L-galactose dehydrogenase	EC:1.1.1.316	3
K00025	MDH1	malate dehydrogenase	EC:1.1.1.37	3
K00028	E1.1.1.39	malate dehydrogenase (decarboxylating)	EC:1.1.1.39	3
K00031	IDH1, IDH2, icd	isocitrate dehydrogenase	EC:1.1.1.42	3
K00033	PGD, gnd	6-phosphogluconate dehydrogenase	EC:1.1.1.44	3
K08967	mtnD, mtnZ, ADI1	1,2-dihydroxy-3-keto-5-methylthiopentene dioxygenase	EC:1.13.11.53 1.13.11.54	3
K09755	CYP84A, F5H	ferulate-5-hydroxylase	EC:1.14.-.-	3
K00487	CYP73A	trans-cinnamate 4-monooxygenase	EC:1.14.13.11	3
K00511	SQL ERG1	squalene monooxygenase	EC:1.14.13.132	3
K00522	FTH1	ferritin heavy chain	EC:1.16.3.2	3
K03526	gcp ispG	(E)-4-hydroxy-3-methylbut-2-enyl-diphosphate synthase	EC:1.17.7.1	3
K00134	GAPDH, gapA	glyceraldehyde 3-phosphate dehydrogenase	EC:1.2.1.12	3
K09753	CCR	cinnamoyl-CoA reductase	EC:1.2.1.44	3
K08695	ANR	anthocyanidin reductase	EC:1.3.1.77	3
K00231	PPOX, hemY	oxygen-dependent protoporphyrinogen oxidase	EC:1.3.3.4	3
K00235	SDHB, SDH2	succinate dehydrogenase (ubiquinone) iron-sulfur subunit	EC:1.3.5.1	3
K00234	SDHA, SDH1	succinate dehydrogenase (ubiquinone) flavoprotein subunit	EC:1.3.5.1	3
K02495	h hemZ	oxygen-independent coproporphyrinogen III oxidase	EC:1.3.99.22	3
K00284	E1.4.7.1	glutamate synthase (ferredoxin)	EC:1.4.7.1	3
K17839	PAO4, PAO3, PAO2	polyamine oxidase	EC:1.5.3.17 1.5.3.-	3
K13447	RBOH	respiratory burst oxidase	EC:1.6.3.- 1.11.1.-	3
K00382	DLD, lpd, pdhD	dihydrolipoamide dehydrogenase	EC:1.8.1.4	3
K00384	trxB	thioredoxin reductase (NADPH)	EC:1.8.1.9	3
K14563	NOP1, FBL	rRNA 2'-O-methyltransferase fibrillarin	EC:2.1.1.-	3
K00588	E2.1.1.104	caffeoyl-CoA O-methyltransferase	EC:2.1.1.104	3
K11423	S SET2	histone-lysine N-methyltransferase SETD2	EC:2.1.1.43	3
K00627	DLAT, ac pdhC	pyruvate dehydrogenase E2 component (dihydrolipoamide acetyltransferase)	EC:2.3.1.12	3
K00626	atoB	acetyl-CoA C-acetyltransferase	EC:2.3.1.9	3
K00705	malQ	4-alpha-glucanotransferase	EC:2.4.1.25	3
K03850	ALG10	alpha-1,2-glucosyltransferase	EC:2.4.1.256	3
K00767	nadC, QPRT	nicotinate-nucleotide pyrophosphorylase (carboxylating)	EC:2.4.2.19	3
K02291	crtB	phytoene synthase	EC:2.5.1.32	3
K01739	metB	cystathionine gamma-synthase	EC:2.5.1.48	3
K11778	DHDDS, R SRT1	ditrans,polycis-polyprenyl diphosphate synthase	EC:2.5.1.87	3
K05290	PIGK	phosphatidylinositol glycan, class K	EC:2.6.-.-	3
K14455	GOT2	aspartate aminotransferase, mitochondrial	EC:2.6.1.1	3
K13950	pabAB	para-aminobenzoate synthetase	EC:2.6.1.85	3
K16871	POP2	4-aminobutyrate---pyruvate transaminase	EC:2.6.1.96	3
K00900	PFK	6-phosphofructo-2-kinase	EC:2.7.1.105	3
K00902	E2.7.1.108	dolichol kinase	EC:2.7.1.108	3
K00859	coaE	dephospho-CoA kinase	EC:2.7.1.24	3
K00864	glpK, GK	glycerol kinase	EC:2.7.1.30	3
K00868	pdxK, pdxY	pyridoxine kinase	EC:2.7.1.35	3
K14153	thiDE	hydroxymethylpyrimidine kinase / phosphomethylpyrimidine kinase / thiamine-phosphate diphosphorylase	EC:2.7.1.49 2.7.4.7 2.5.1.3	3
K07178	RIOK1	RIO kinase 1	EC:2.7.11.1	3
K02202	CDK7	cyclin-dependent kinase 7	EC:2.7.11.22 2.7.11.23	3
K04371	MAPK1_3	mitogen-activated protein kinase 1/3	EC:2.7.11.24	3
K04368	MAP2K1, MEK1	mitogen-activated protein kinase kinase 1	EC:2.7.12.2	3
K00942	gmk	guanylate kinase	EC:2.7.4.8	3
K14376	PAP	poly(A) polymerase	EC:2.7.7.19	3
K12447	USP	UDP-sugar pyrophosphorylase	EC:2.7.7.64	3
K14190	VTC2_5	GDP-L-galactose phosphorylase	EC:2.7.7.69	3
K02324	POLE1	DNA polymerase epsilon subunit 1	EC:2.7.7.7	3
K00962	pnp, PNPT1	polyribonucleotide nucleotidyltransferase	EC:2.7.7.8	3
K01011	TST, MPST, sseA	thiosulfate/3-mercaptopyruvate sulfurtransferase	EC:2.8.1.1 2.8.1.2	3
K03644	lipA	lipoic acid synthetase	EC:2.8.1.8	3
K04799	F RAD2	flap endonuclease-1	EC:3.-.-.-	3
K01052	LIPA	lysosomal acid lipase/cholesteryl ester hydrolase	EC:3.1.1.13	3
K01148	PARN	poly(A)-specific ribonuclease	EC:3.1.13.4	3
K01074	PPT	palmitoyl-protein thioesterase	EC:3.1.2.22	3
K06269	PPP1C	serine/threonine-protein phosphatase PP1 catalytic subunit	EC:3.1.3.16	3
K01126	glpQ, ugpQ	glycerophosphoryl diester phosphodiesterase	EC:3.1.4.46	3
K01230	MAN1	mannosyl-oligosaccharide alpha-1,2-mannosidase	EC:3.2.1.113	3
K15920	XYL4	beta-D-xylosidase 4	EC:3.2.1.37	3
K01206	FUCA	alpha-L-fucosidase	EC:3.2.1.51	3
K01209	abfA	alpha-N-arabinofuranosidase	EC:3.2.1.55	3
K05546	GANAB	alpha 1,3-glucosidase	EC:3.2.1.84	3
K01227	E3.2.1.96	mannosyl-glycoprotein endo-beta-N-acetylglucosaminidase	EC:3.2.1.96	3
K14677	ACY1	aminoacylase	EC:3.5.1.14	3
K01490	AMPD	AMP deaminase	EC:3.5.4.6	3
K12599	SKI2, SKIV2L	antiviral helicase SKI2	EC:3.6.4.-	3
K02541	MCM3	DNA replication licensing factor MCM3	EC:3.6.4.12	3
K10742	DNA2	DNA replication ATP-dependent helicase Dna2	EC:3.6.4.12	3
K12818	DHX8, PRP22	ATP-dependent RNA helicase DHX8/PRP22	EC:3.6.4.13	3
K12813	DHX16	pre-mRNA-splicing factor ATP-dependent RNA helicase DHX16	EC:3.6.4.13	3
K01528	DNM	dynamin GTPase	EC:3.6.5.5	3
K01581	ODC1, sp speF	ornithine decarboxylase	EC:4.1.1.17	3
K01595	ppc	phosphoenolpyruvate carboxylase	EC:4.1.1.31	3
K01613	psd, PISD	phosphatidylserine decarboxylase	EC:4.1.1.65	3
K01673	cynT, can	carbonic anhydrase	EC:4.2.1.1	3
K12450	RHM	UDP-glucose 4,6-dehydratase	EC:4.2.1.76	3
K01723	AOS	hydroperoxide dehydratase	EC:4.2.1.92	3
K05309	PTGES2	microsomal prostaglandin-E synthase 2	EC:5.3.99.3	3
K15813	LUP4	beta-amyrin synthase	EC:5.4.99.39	3
K14164	glyQS	glycyl-tRNA synthetase	EC:6.1.1.14	3
K01885	gltX	glutamyl-tRNA synthetase	EC:6.1.1.17	3
K01900	LSC2	succinyl-CoA synthetase beta subunit	EC:6.2.1.4 6.2.1.5	3
K04706	PIAS1	E3 SUMO-protein ligase PIAS1	EC:6.3.2.-	3
K03178	UB UBA1	ubiquitin-activating enzyme E1	EC:6.3.2.19	3
K04506	SIAH1	E3 ubiquitin-protein ligase SIAH1	EC:6.3.2.19	3
K10143	RFWD2, COP1	E3 ubiquitin-protein ligase RFWD2	EC:6.3.2.19	3
K01922	PPCS, coaB	phosphopantothenate-cysteine ligase	EC:6.3.2.5	3
K01933	purM	phosphoribosylformylglycinamidine cyclo-ligase	EC:6.3.3.1	3
K01962	accA	acetyl-CoA carboxylase carboxyl transferase subunit alpha	EC:6.4.1.2	3
K10777	LIG4, DNL4	DNA ligase 4	EC:6.5.1.1	3
K10747	LIG1	DNA ligase 1	EC:6.5.1.1	3
K10846	XPG, RAD2	DNA excision repair protein ERCC-5		3
K13424	WRKY33	WRKY transcription factor 33		3
K12670	WBP1	oligosaccharyltransferase complex subunit beta		3
K06666	TUP1	glucose repression regulatory protein TUP1		3
K07374	TUBA	tubulin alpha		3
K09291	TPR	nucleoprotein TPR		3
K13174	THOC5	THO complex subunit 5		3
K03146	THI4, THI1	thiamine thiazole synthase		3
K03122	TFIIA1, GTF2A1, TOA1	transcription initiation factor TFIIA large subunit		3
K03137	TFII GTF2 TFA2	transcription initiation factor TFIIE subunit beta		3
K03136	TFII GTF2 TFA1, tfe	transcription initiation factor TFIIE subunit alpha		3
K03128	TAF2	transcription initiation factor TFIID subunit 2		3
K06100	SYMPK	symplekin		3
K12667	SWP1, RPN2	oligosaccharyltransferase complex subunit delta (ribophorin II)		3
K13249	SSR1	translocon-associated protein subunit alpha		3
K12893	SFRS4_5_6	splicing factor, arginine/serine-rich 4/5/6		3
K03070	secA	preprotein translocase subunit SecA		3
K03678	RRP45, EXOSC9	exosome complex component RRP45		3
K02995	RP-S8 RPS8	small subunit ribosomal protein S8e		3
K02872	RP-L13A RPL13A	large subunit ribosomal protein L13Ae		3
K03026	RPC53, POLR3D	DNA-directed RNA polymerase III subunit RPC4		3
K13456	RIN4	RPM1-interacting protein 4		3
K03553	recA	recombination protein RecA		3
K10870	RAD51L2, RAD51C	RAD51-like protein 2		3
K03065	PSMC3, RPT5	26S proteasome regulatory subunit T5		3
K03061	PSMC2, RPT1	26S proteasome regulatory subunit T1		3
K12129	PRR7	pseudo-response regulator 7		3
K03504	POLD3	DNA polymerase delta subunit 3		3
K02321	POLA2	DNA polymerase alpha subunit B		3
K13343	PEX14	peroxin-14		3
K04802	PCNA	proliferating cell nuclear antigen		3
K13345	P PAF3	peroxin-12		3
K14301	NUP107	nuclear pore complex protein Nup107		3
K08915	LHCB4	light-harvesting complex II chlorophyll a/b binding protein 4		3
K08341	GABARAP, ATG8, LC3	GABA(A) receptor-associated protein		3
K03110	ftsY	fused signal recognition particle receptor		3
K12125	ELF3	protein EARLY FLOWERING 3		3
K03243	EIF5B	translation initiation factor 5B		3
K03260	EIF4G	translation initiation factor 4G		3
K03259	EIF4E	translation initiation factor 4E		3
K03754	EIF2B2	translation initiation factor eIF-2B subunit beta		3
K14398	CPSF6_7	cleavage and polyadenylation specificity factor subunit 6/7		3
K14404	CPSF4, YTH1	cleavage and polyadenylation specificity factor subunit 4		3
K12603	CNOT6, CCR4	CCR4-NOT transcription complex subunit 6		3
K12580	CNOT3, NOT3	CCR4-NOT transcription complex subunit 3		3
K03364	CDH1	cell division cycle 20-like protein 1, cofactor of APC complex		3
K02149	ATP ATP6M	V-type H+-transporting ATPase subunit D		3
K03661	ATP ATP6F	V-type H+-transporting ATPase 21kDa proteolipid subunit		3
K02146	ATP ATP6D	V-type H+-transporting ATPase subunit d		3
K08339	ATG5	autophagy-related protein 5		3
K08331	ATG13	autophagy-related protein 13		3
K12492	ARFGAP1	ADP-ribosylation factor GTPase-activating protein 1		3
K07937	ARF1	ADP-ribosylation factor 1		3
K11824	AP2A	AP-2 complex subunit alpha		3
K15095	E1.1.1.208	(+)-neomenthol dehydrogenase	EC:1.1.1.208	2
K00099	dxr	1-deoxy-D-xylulose-5-phosphate reductoisomerase	EC:1.1.1.267	2
K00016	LDH, ldh	L-lactate dehydrogenase	EC:1.1.1.27	2
K18121	GLYR	glyoxylate/succinic semialdehyde reductase	EC:1.1.1.79 1.1.1.-	2
K05824	LYS12	homoisocitrate dehydrogenase	EC:1.1.1.87	2
K00111	glpA, glpD	glycerol-3-phosphate dehydrogenase	EC:1.1.5.3	2
K11188	PRDX6	peroxiredoxin 6, 1-Cys peroxiredoxin	EC:1.11.1.7 1.11.1.15 3.1.1.-	2
K00469	MIOX	inositol oxygenase	EC:1.13.99.1	2
K09589	CYP90D2, D2	steroid 3-oxidase	EC:1.14.-.-	2
K05282	E1.14.11.12	gibberellin 20-oxidase	EC:1.14.11.12	2
K04124	E1.14.11.15	gibberellin 3-beta-dioxygenase	EC:1.14.11.15	2
K00475	E1.14.11.9	naringenin 3-dioxygenase	EC:1.14.11.9	2
K06126	COQ6	ubiquinone biosynthesis monooxygenase Coq6	EC:1.14.13.-	2
K12638	CYP90D1	3-epi-6-deoxocathasterone 23-monooxygenase	EC:1.14.13.112	2
K00510	HMOX, hmuO, ho	heme oxygenase	EC:1.14.99.3	2
K03527	ispH, lytB	4-hydroxy-3-methylbut-2-enyl diphosphate reductase	EC:1.17.1.2	2
K00135	gabD	succinate-semialdehyde dehydrogenase / glutarate-semialdehyde dehydrogenase	EC:1.2.1.16 1.2.1.79 1.2.1.20	2
K00140	mmsA, iolA, ALDH6A1	malonate-semialdehyde dehydrogenase (acetylating) / methylmalonate-semialdehyde dehydrogenase	EC:1.2.1.18 1.2.1.27	2
K09591	DET2	steroid 5-alpha-reductase	EC:1.3.1.22	2
K13237	DECR2	peroxisomal 2,4-dienoyl-CoA reductase	EC:1.3.1.34	2
K00223	ERG4	delta24(24(1))-sterol reductase	EC:1.3.1.71	2
K09828	DHCR24	delta24-sterol reductase	EC:1.3.1.72	2
K00208	fabI	enoyl-[acyl-carrier protein reductase I	EC:1.3.1.9 1.3.1.10	2
K00261	GLUD1_2, gdhA	glutamate dehydrogenase (NAD(P)+)	EC:1.4.1.3	2
K00275	pdxH, PNPO	pyridoxamine 5'-phosphate oxidase	EC:1.4.3.5	2
K00318	PRODH	proline dehydrogenase	EC:1.5.-.-	2
K03934	NDUFS1	NADH dehydrogenase (ubiquinone) Fe-S protein 1	EC:1.6.5.3 1.6.99.3	2
K10534	NR	nitrate reductase (NAD(P)H)	EC:1.7.1.1 1.7.1.2 1.7.1.3	2
K00366	nirA	ferredoxin-nitrite reductase	EC:1.7.7.1	2
K10976	ERO1LB	ERO1-like protein beta	EC:1.8.4.-	2
K00392	sir	sulfite reductase (ferredoxin)	EC:1.8.7.1	2
K14292	TGS1	trimethylguanosine synthase	EC:2.1.1.-	2
K05929	NMT	phosphoethanolamine N-methyltransferase	EC:2.1.1.103	2
K08241	E2.1.1.141	jasmonate O-methyltransferase	EC:2.1.1.141	2
K00558	DNMT1, dcm	DNA (cytosine-5)-methyltransferase 1	EC:2.1.1.37	2
K00559	SMT1, ERG6	sterol 24-C-methyltransferase	EC:2.1.1.41	2
K01653	ilvH, ilvN	acetolactate synthase I/III small subunit	EC:2.2.1.6	2
K01652	ilvB, ilvG, ilvI	acetolactate synthase I/II/III large subunit	EC:2.2.1.6	2
K14682	argAB	amino-acid N-acetyltransferase	EC:2.3.1.1	2
K13065	HCT	shikimate O-hydroxycinnamoyltransferase	EC:2.3.1.133	2
K00630	ATS1	glycerol-3-phosphate O-acyltransferase	EC:2.3.1.15	2
K00648	fabH	3-oxoacyl-[acyl-carrier-protein synthase III	EC:2.3.1.180	2
K15400	HHT1	omega-hydroxypalmitate O-feruloyl transferase	EC:2.3.1.188	2
K13510	LPCAT1_2	lysophosphatidylcholine acyltransferase / lyso-PAF acetyltransferase	EC:2.3.1.23 2.3.1.67	2
K00652	bioF	8-amino-7-oxononanoate synthase	EC:2.3.1.47	2
K00658	DLST, sucB	2-oxoglutarate dehydrogenase E2 component (dihydrolipoamide succinyltransferase)	EC:2.3.1.61	2
K12356	UGT72E	coniferyl-alcohol glucosyltransferase	EC:2.4.1.111	2
K07441	ALG14	beta-1,4-N-acetylglucosaminyltransferase	EC:2.4.1.141	2
K09480	E2.4.1.241	digalactosyldiacylglycerol synthase	EC:2.4.1.241	2
K09667	OGT	protein O-GlcNAc transferase	EC:2.4.1.255	2
K01663	HIS7	glutamine amidotransferase / cyclase	EC:2.4.2.- 4.1.3.-	2
K00764	purF, PPAT	amidophosphoribosyltransferase	EC:2.4.2.14	2
K00765	hisG	ATP phosphoribosyltransferase	EC:2.4.2.17	2
K07151	STT3	dolichyl-diphosphooligosaccharide--protein glycosyltransferase	EC:2.4.99.18	2
K04040	chlG, bchG	chlorophyll synthase	EC:2.5.1.62	2
K03517	nadA	quinolinate synthase	EC:2.5.1.72	2
K02548	menA	1,4-dihydroxy-2-naphthoate octaprenyltransferase	EC:2.5.1.74 2.5.1.-	2
K05355	h COQ1	hexaprenyl-diphosphate synthase	EC:2.5.1.82 2.5.1.83	2
K00793	rib RIB5	riboflavin synthase	EC:2.5.1.9	2
K14454	GOT1	aspartate aminotransferase, cytoplasmic	EC:2.6.1.1	2
K00811	ASP5	aspartate aminotransferase, chloroplastic	EC:2.6.1.1	2
K00833	bioA	adenosylmethionine-8-amino-7-oxononanoate aminotransferase	EC:2.6.1.62	2
K10206	E2.6.1.83	LL-diaminopimelate aminotransferase	EC:2.6.1.83	2
K16903	TAA1	L-tryptophan---pyruvate aminotransferase	EC:2.6.1.99	2
K00914	PIK3C3, VPS34	phosphatidylinositol 3-kinase	EC:2.7.1.137	2
K04715	CERK	ceramide kinase	EC:2.7.1.138	2
K00915	IPK2	1D-myo-Inositol-tetrakisphosphate 5-kinase / inositol-polyphosphate multikinase	EC:2.7.1.140 2.7.1.151	2
K00858	ppnK, NADK	NAD+ kinase	EC:2.7.1.23	2
K00860	cysC	adenylylsulfate kinase	EC:2.7.1.25	2
K00861	RFK, FMN1	riboflavin kinase	EC:2.7.1.26	2
K14156	CHK	choline/ethanolamine kinase	EC:2.7.1.32 2.7.1.82	2
K09680	coaW	type II pantothenate kinase	EC:2.7.1.33	2
K16190	GLCAK	glucuronokinase	EC:2.7.1.43	2
K07198	PRKAA, AMPK	5'-AMP-activated protein kinase, catalytic alpha subunit	EC:2.7.11.11	2
K12524	thrA	bifunctional aspartokinase / homoserine dehydrogenase 1	EC:2.7.2.4 1.1.1.3	2
K00948	PRPS, prsA	ribose-phosphate pyrophosphokinase	EC:2.7.6.1	2
K00967	PCYT2	ethanolamine-phosphate cytidylyltransferase	EC:2.7.7.14	2
K03046	rpoC	DNA-directed RNA polymerase subunit beta'	EC:2.7.7.6	2
K03006	RPB1, POLR2A	DNA-directed RNA polymerase II subunit RPB1	EC:2.7.7.6	2
K02999	RPA1, POLR1A	DNA-directed RNA polymerase I subunit RPA1	EC:2.7.7.6	2
K02327	POLD1	DNA polymerase delta subunit 1	EC:2.7.7.7	2
K00963	UGP2, galU, galF	UTP--glucose-1-phosphate uridylyltransferase	EC:2.7.7.9	2
K11821	ST5A_B_C	desulfoglucosinolate sulfotransferase A/B/C	EC:2.8.2.-	2
K10746	EXO1	exonuclease 1	EC:3.1.-.-	2
K10781	FATB	fatty acyl-ACP thioesterase B	EC:3.1.2.14 3.1.2.21	2
K01069	gloB	hydroxyacylglutathione hydrolase	EC:3.1.2.6	2
K10743	RNASEH2A	ribonuclease H2 subunit A	EC:3.1.26.4	2
K18213	PRORP	proteinaceous RNase P	EC:3.1.26.5	2
K01091	gph	phosphoglycolate phosphatase	EC:3.1.3.18	2
K01078	E3.1.3.2	acid phosphatase	EC:3.1.3.2	2
K01183	E3.2.1.14	chitinase	EC:3.2.1.14	2
K01179	E3.2.1.4	endoglucanase	EC:3.2.1.4	2
K01210	E3.2.1.58	glucan 1,3-beta-glucosidase	EC:3.2.1.58	2
K13280	S sipW	signal peptidase, endoplasmic reticulum-type	EC:3.4.-.-	2
K03100	lepB	signal peptidase I	EC:3.4.21.89	2
K06013	STE24	STE24 endopeptidase	EC:3.4.24.84	2
K02738	PSMB6	20S proteasome subunit beta 1	EC:3.4.25.1	2
K02729	PSMA5	20S proteasome subunit alpha 5	EC:3.4.25.1	2
K13566	NIT2	omega-amidase	EC:3.5.1.3	2
K01465	URA4, pyrC	dihydroorotase	EC:3.5.2.3	2
K10536	E3.5.3.12	agmatine deiminase	EC:3.5.3.12	2
K01488	add, ADA	adenosine deaminase	EC:3.5.4.4	2
K01517	ADPRM	manganese-dependent ADP-ribose/CDP-alcohol diphosphatase	EC:3.6.1.13 3.6.1.16 3.6.1.53	2
K01519	ITPA	inosine triphosphate pyrophosphatase	EC:3.6.1.19	2
K11755	hisIE	phosphoribosyl-ATP pyrophosphohydrolase / phosphoribosyl-AMP cyclohydrolase	EC:3.6.1.31 3.5.4.19	2
K14326	UPF1, RENT1	regulator of nonsense transcripts 1	EC:3.6.4.-	2
K03139	TFIIF2, GTF2F2, TFG2	transcription initiation factor TFIIF subunit beta	EC:3.6.4.12	2
K03655	recG	ATP-dependent DNA helicase RecG	EC:3.6.4.12	2
K02212	MCM4, CDC54	DNA replication licensing factor MCM4	EC:3.6.4.12	2
K02540	MCM2	DNA replication licensing factor MCM2	EC:3.6.4.12	2
K12811	DDX46, PRP5	ATP-dependent RNA helicase DDX46/PRP5	EC:3.6.4.13	2
K12835	DDX42, SF3B125	ATP-dependent RNA helicase DDX42	EC:3.6.4.13	2
K01586	lysA	diaminopimelate decarboxylase	EC:4.1.1.20	2
K01609	trpC	indole-3-glycerol phosphate synthase	EC:4.1.1.48	2
K01634	E4.1.2.27	sphinganine-1-phosphate aldolase	EC:4.1.2.27	2
K01658	trpG	anthranilate synthase component II	EC:4.1.3.27	2
K15823	PEN1	arabidiol synthase	EC:4.2.1.124	2
K01695	trpA	tryptophan synthase alpha chain	EC:4.2.1.20	2
K01681	ACO, acnA	aconitate hydratase	EC:4.2.1.3	2
K02372	fabZ	3-hydroxyacyl-[acyl-carrier-protein dehydratase	EC:4.2.1.59	2
K14044	KSL8, DTC2	stemar-13-ene synthase	EC:4.2.3.33	2
K15802	SSTLE1	germacrene C synthase	EC:4.2.3.60	2
K10773	NTH	endonuclease III	EC:4.2.99.18	2
K13064	PTAL	phenylalanine/tyrosine ammonia-lyase	EC:4.3.1.25	2
K01714	dapA	4-hydroxy-tetrahydrodipicolinate synthase	EC:4.3.3.7	2
K01760	metC	cystathionine beta-lyase	EC:4.4.1.8	2
K09835	crtISO, crtH	prolycopene isomerase	EC:5.2.1.13	2
K01803	TPI, tpiA	triosephosphate isomerase (TIM)	EC:5.3.1.1	2
K01805	xylA	xylose isomerase	EC:5.3.1.5	2
K01823	idi, IDI	isopentenyl-diphosphate delta-isomerase	EC:5.3.3.2	2
K01835	pgm	phosphoglucomutase	EC:5.4.2.2	2
K01836	E5.4.2.3	phosphoacetylglucosamine mutase	EC:5.4.2.3	2
K11131	DKC1, NOLA4, CBF5	H/ACA ribonucleoprotein complex subunit 4	EC:5.4.99.-	2
K15821	THAS1	thalianol synthase	EC:5.4.99.31	2
K01850	E5.4.99.5	chorismate mutase	EC:5.4.99.5	2
K01852	LSS, ERG7	lanosterol synthase	EC:5.4.99.7	2
K06444	lcy crtL2	lycopene epsilon-cyclase	EC:5.5.1.18	2
K06443	lcyB, crtL1, crtY	lycopene beta-cyclase	EC:5.5.1.19	2
K01866	YARS, tyrS	tyrosyl-tRNA synthetase	EC:6.1.1.1	2
K01892	HARS, hisS	histidyl-tRNA synthetase	EC:6.1.1.21	2
K01870	IARS, ileS	isoleucyl-tRNA synthetase	EC:6.1.1.5	2
K04567	KARS, lysS	lysyl-tRNA synthetase, class II	EC:6.1.1.6	2
K10575	UB UBC7	ubiquitin-conjugating enzyme E2 G1	EC:6.3.2.19	2
K10579	UB UBC12	ubiquitin-conjugating enzyme E2 M	EC:6.3.2.19	2
K04554	UB NCUB UBC6	ubiquitin-conjugating enzyme E2 J2	EC:6.3.2.19	2
K10580	UB BLU, UBC13	ubiquitin-conjugating enzyme E2 N	EC:6.3.2.19	2
K10590	TRIP12	E3 ubiquitin-protein ligase TRIP12	EC:6.3.2.19	2
K10591	N RSP5	E3 ubiquitin-protein ligase NEDD4	EC:6.3.2.19	2
K10592	HUW MUL ARF-BP1	E3 ubiquitin-protein ligase HUWE1	EC:6.3.2.19	2
K04649	HIP2, UBC1	ubiquitin-conjugating enzyme (huntingtin interacting protein 2)	EC:6.3.2.19	2
K10606	FANCL, PHF9	E3 ubiquitin-protein ligase FANCL	EC:6.3.2.19	2
K01923	purC	phosphoribosylaminoimidazole-succinocarboxamide synthase	EC:6.3.2.6	2
K01934	E6.3.3.2	5-formyltetrahydrofolate cyclo-ligase	EC:6.3.3.2	2
K11788	ADE5	phosphoribosylamine--glycine ligase / phosphoribosylformylglycinamidine cyclo-ligase	EC:6.3.4.13 6.3.3.1	2
K01939	purA, ADSS	adenylosuccinate synthase	EC:6.3.4.4	2
K01940	argG, ASS1	argininosuccinate synthase	EC:6.3.4.5	2
K08516	YKT6	synaptobrevin homolog YKT6		2
K03217	yidC, spoIIIJ, OXA1	YidC/Oxa1 family membrane protein insertase		2
K14290	XPO1, CRM1	exportin-1		2
K13425	WRKY22	WRKY transcription factor 22		2
K12199	VTA1, LIP5	vacuolar protein sorting-associated protein VTA1		2
K09834	VT SXD1	tocopherol cyclase		2
K12502	VT APG1	MPBQ/MSBQ methyltransferase		2
K08332	VAC8	vacuolar protein 8		2
K14546	UTP5, WDR43	U3 small nucleolar RNA-associated protein 5		2
K14544	UTP22, NOL6	U3 small nucleolar RNA-associated protein 22		2
K14549	UTP15	U3 small nucleolar RNA-associated protein 15		2
K08507	USE1	unconventional SNARE in the endoplasmic reticulum protein 1		2
K14328	UPF3, RENT3	regulator of nonsense transcripts 3		2
K04523	UBQLN, DSK2	ubiquilin		2
K12183	TSG101, STP22, VPS23	ESCRT-I complex subunit TSG101		2
K12881	THOC4, ALY	THO complex subunit 4		2
K03141	TFIIH1, GTF2H1, TFB1	transcription initiation factor TFIIH subunit 1		2
K03120	TBP, tbp	transcription initiation factor TFIID TATA-box-binding protein		2
K03129	TAF4	transcription initiation factor TFIID subunit 4		2
K03125	TAF1	transcription initiation factor TFIID subunit 1		2
K08503	SYP5	syntaxin of plants SYP5		2
K03113	SUI1	translation initiation factor 1		2
K12795	SUGT1, SGT1	suppressor of G2 allele of SKP1		2
K13431	SRPR	signal recognition particle receptor subunit alpha		2
K08873	SMG1	PI-3-kinase-related kinase SMG-1		2
K06675	SMC4	structural maintenance of chromosome 4		2
K12819	SLU7	pre-mRNA-processing factor SLU7		2
K12891	SFRS2	splicing factor, arginine/serine-rich 2		2
K12829	SF3B2, SAP145, CUS1	splicing factor 3B subunit 2		2
K12828	SF3B1, SAP155	splicing factor 3B subunit 1		2
K08517	SEC22	vesicle transport protein SEC22		2
K11984	SART1, HAF, SNU66	U4/U6.U5 tri-snRNP-associated protein 1		2
K02991	RP-S6 RPS6	small subunit ribosomal protein S6e		2
K02989	RP-S5 RPS5	small subunit ribosomal protein S5e		2
K13460	RPS5	disease resistance protein RPS5		2
K02984	RP-S3A RPS3A	small subunit ribosomal protein S3Ae		2
K02957	RP-S15A RPS15A	small subunit ribosomal protein S15Ae		2
K02949	RP-S11 RPS11	small subunit ribosomal protein S11e		2
K02945	RP-S1, rpsA	small subunit ribosomal protein S1		2
K02917	RP-L35A RPL35A	large subunit ribosomal protein L35Ae		2
K02897	RP-L25, rplY	large subunit ribosomal protein L25		2
K02890	RP-L22, MRPL22, rplV	large subunit ribosomal protein L22		2
K02880	RP-L17 RPL17	large subunit ribosomal protein L17e		2
K02876	RP-L15, MRPL15, rplO	large subunit ribosomal protein L15		2
K02877	RP-L15 RPL15	large subunit ribosomal protein L15e		2
K02871	RP-L13, MRPL13, rplM	large subunit ribosomal protein L13		2
K02867	RP-L11, MRPL11, rplK	large subunit ribosomal protein L11		2
K02866	RP-L10 RPL10	large subunit ribosomal protein L10e		2
K03025	RPC34, POLR3F	DNA-directed RNA polymerase III subunit RPC6		2
K03022	RPC25, POLR3H	DNA-directed RNA polymerase III subunit RPC8		2
K10744	RNASEH2B	ribonuclease H2 subunit B		2
K14571	RIX7, NVL	ribosome biogenesis ATPase		2
K07936	RAN	GTP-binding nuclear protein Ran		2
K10869	RAD51L1, RAD51B	RAD51-like protein 1		2
K03033	PSMD3, RPN3	26S proteasome regulatory subunit N3		2
K03036	PSMD11, RPN6	26S proteasome regulatory subunit N6		2
K03066	PSMC5, RPT6	26S proteasome regulatory subunit T6		2
K03063	PSMC4, RPT3	26S proteasome regulatory subunit T3		2
K03062	PSMC1, RPT2	26S proteasome regulatory subunit T2		2
K12131	PRR3	pseudo-response regulator 3		2
K12821	PRPF40, PRP40	pre-mRNA-processing factor 40		2
K14003	PR SEC12	prolactin regulatory element-binding protein		2
K13114	PNN	pinin		2
K12862	PLRG1, PRL1, PRP46	pleiotropic regulator 1		2
K05292	PIGT	phosphatidylinositol glycan, class T		2
K05288	PIGO	phosphatidylinositol glycan, class O		2
K12120	PHYA	phytochrome A		2
K12834	PHF5A	PHD finger-like domain-containing protein 5A		2
K14291	PHAX	phosphorylated adapter RNA export protein		2
K13335	PEX16	peroxin-16		2
K14400	PCF11	pre-mRNA cleavage complex 2 protein Pcf11		2
K14396	PABPN1, PABP2	polyadenylate-binding protein 2		2
K12669	OST3, OST6	oligosaccharyltransferase complex subunit gamma		2
K14307	NUPL1	nucleoporin p58/p45		2
K14300	NUP133	nuclear pore complex protein Nup133		2
K14015	NPLOC4, NPL4	nuclear protein localization protein 4 homolog		2
K06943	NOG1	nucleolar GTP-binding protein		2
K13422	MYC2	transcription factor MYC2		2
K10865	MRE11	double-strand break repair protein MRE11		2
K13462	MIN7	guanine nucleotide-exchange factor		2
K14172	LHCB7	light-harvesting complex II chlorophyll a/b binding protein 7		2
K08914	LHCB3	light-harvesting complex II chlorophyll a/b binding protein 3		2
K10760	IPT	adenylate isopentenyltransferase (cytokinin synthase)		2
K12501	HST	homogentisate solanesyltransferase		2
K08496	GOSR2, BOS1	golgi SNAP receptor complex member 2		2
K12124	GI	GIGANTEA		2
K02437	gcvH, GCSH	glycine cleavage system H protein		2
K12900	FUSIP1	FUS-interacting serine-arginine-rich protein 1		2
K14516	ERF1	ethylene-responsive transcription factor 1		2
K03242	EIF2S3	translation initiation factor 2 subunit 3		2
K03241	EIF2B3	translation initiation factor eIF-2B subunit gamma		2
K03239	EIF2B1	translation initiation factor eIF-2B subunit alpha		2
K12483	EHD1	EH domain-containing protein 1		2
K10085	EDEM2	ER degradation enhancer, mannosidase alpha-like 2		2
K14408	CSTF3, RNA14	cleavage stimulation factor subunit 3		2
K10841	CSB, RAD26	DNA excision repair protein ERCC-6		2
K13463	COI-1	coronatine-insensitive protein 1		2
K06634	CCNH	cyclin H		2
K14503	BZR1_2	brassinosteroid resistant 1/2		2
K14499	BKI1	BRI1 kinase inhibitor 1		2
K14009	BCAP31, BAP31	B-cell receptor-associated protein 31		2
K02115	ATPF1G, atpG	F-type H+-transporting ATPase subunit gamma		2
K02109	ATPF0B, atpF	F-type H+-transporting ATPase subunit b		2
K02126	ATP MTATP6, ATP6	F-type H+-transporting ATPase subunit a		2
K02150	ATP ATP6E	V-type H+-transporting ATPase subunit E		2
K02147	ATP ATP6B	V-type H+-transporting ATPase subunit B		2
K02128	ATP ATP5G, ATP9	F-type H+-transporting ATPase subunit c		2
K03354	APC7	anaphase-promoting complex subunit 7		2
K03350	APC3, CDC27	anaphase-promoting complex subunit 3		2
K05665	ABCC1	ATP-binding cassette, subfamily C (CFTR/MRP), member 1		2
K05663	ABC.ATM	mitochondrial ABC transporter ATM		2
K13606	NOL, NYC1	chlorophyll(ide) b reductase	EC:1.1.1.294	1
K17743	XR	D-xylose reductase	EC:1.1.1.307	1
K00020	mmsB	3-hydroxyisobutyrate dehydrogenase	EC:1.1.1.31	1
K00030	IDH3	isocitrate dehydrogenase (NAD+)	EC:1.1.1.41	1
K10251	HSD17B12, KAR, IFA38	17beta-estradiol 17-dehydrogenase / very-long-chain 3-oxoacyl-CoA reductase	EC:1.1.1.62 1.1.1.330	1
K05275	E1.1.1.65	pyridoxine 4-dehydrogenase	EC:1.1.1.65	1
K00006	GPD1	glycerol-3-phosphate dehydrogenase (NAD+)	EC:1.1.1.8	1
K00053	ilvC	ketol-acid reductoisomerase	EC:1.1.1.86	1
K00102	dld	D-lactate dehydrogenase (cytochrome)	EC:1.1.2.4	1
K11517	HAO	(S)-2-hydroxy-acid oxidase	EC:1.1.3.15	1
K00411	UQCRFS1, RIP1, petA	ubiquinol-cytochrome c reductase iron-sulfur subunit	EC:1.10.2.2	1
K17725	ETHE1	sulfur dioxygenase	EC:1.13.11.18	1
K00457	HPD, hppD	4-hydroxyphenylpyruvate dioxygenase	EC:1.13.11.27	1
K00451	HGD, hmgA	homogentisate 1,2-dioxygenase	EC:1.13.11.5	1
K15747	LUT5, CYP97A3	beta-ring hydroxylase	EC:1.14.-.-	1
K12640	CYP85A2, BR6OX2	brassinosteroid-6-oxidase 2	EC:1.14.-.-	1
K05277	E1.14.11.19	leucoanthocyanidin dioxygenase	EC:1.14.11.19	1
K15506	CYP98A8_9	cytochrome P450, family 98, subfamily A, polypeptide 8/9	EC:1.14.13.-	1
K12637	CYP90C1, ROT3	3-epi-6-deoxocathasterone 23-monooxygenase	EC:1.14.13.112	1
K15472	CYP71D55	premnaspirodiene oxygenase	EC:1.14.13.121	1
K13600	CAO	chlorophyllide a oxygenase	EC:1.14.13.122	1
K15746	crtZ	beta-carotene 3-hydroxylase	EC:1.14.13.129	1
K05917	CYP51	sterol 14-demethylase	EC:1.14.13.70	1
K14424	SMO2	4-alpha-methyl-delta7-sterol-4alpha-methyl oxidase	EC:1.14.13.72	1
K04035	acsF, chlE	magnesium-protoporphyrin IX monomethyl ester (oxidative) cyclase	EC:1.14.13.81	1
K13083	CYP75A	flavonoid 3',5'-hydroxylase	EC:1.14.13.88	1
K09838	Z ABA1	zeaxanthin epoxidase	EC:1.14.13.90	1
K10257	FAD8, desB	omega-3 fatty acid desaturase (delta-15 desaturase)	EC:1.14.19.-	1
K10256	FAD2	omega-6 fatty acid desaturase (delta-12 desaturase)	EC:1.14.19.-	1
K13229	BX6	2,4-dihydroxy-1,4-benzoxazin-3-one-glucoside dioxygenase	EC:1.14.20.2	1
K00227	SC5DL, ERG3	lathosterol oxidase	EC:1.14.21.6	1
K04565	SOD1	superoxide dismutase, Cu-Zn family	EC:1.15.1.1	1
K10808	RRM2	ribonucleoside-diphosphate reductase subunit M2	EC:1.17.4.1	1
K10807	RRM1	ribonucleoside-diphosphate reductase subunit M1	EC:1.17.4.1	1
K18010	HCAR	7-hydroxymethyl chlorophyll a reductase	EC:1.17.7.2	1
K02641	petH	ferredoxin--NADP+ reductase	EC:1.18.1.2	1
K00133	asd	aspartate-semialdehyde dehydrogenase	EC:1.2.1.11	1
K05298	GAPA	glyceraldehyde-3-phosphate dehydrogenase (NADP+) (phosphorylating)	EC:1.2.1.13	1
K17761	SSADH	succinate-semialdehyde dehydrogenase, mitochondrial	EC:1.2.1.24	1
K00145	argC	N-acetyl-gamma-glutamyl-phosphate reductase	EC:1.2.1.38	1
K00147	proA	glutamate-5-semialdehyde dehydrogenase	EC:1.2.1.41	1
K00167	BCKDHB, bkdA2	2-oxoisovalerate dehydrogenase E1 component beta subunit	EC:1.2.4.4	1
K00207	DPYD	dihydropyrimidine dehydrogenase (NADP+)	EC:1.3.1.2	1
K07512	M NRBF1	mitochondrial trans-2-enoyl-CoA reductase	EC:1.3.1.38	1
K13545	ACD2	red chlorophyll catabolite reductase	EC:1.3.1.80	1
K10960	chlP, bchP	geranylgeranyl reductase	EC:1.3.1.83	1
K10258	T TSC13, CER10	very-long-chain enoyl-CoA reductase	EC:1.3.1.93	1
K00254	DHODH, pyrD	dihydroorotate dehydrogenase	EC:1.3.5.2	1
K02293	PDS, crtP	15-cis-phytoene desaturase	EC:1.3.5.5	1
K00249	ACADM, acd	acyl-CoA dehydrogenase	EC:1.3.8.7	1
K15371	GDH2	glutamate dehydrogenase	EC:1.4.1.2	1
K00262	gdhA	glutamate dehydrogenase (NADP+)	EC:1.4.1.4	1
K00278	nadB	L-aspartate oxidase	EC:1.4.3.16	1
K00281	GLDC, gcvP	glycine dehydrogenase	EC:1.4.4.2	1
K00286	proC	pyrroline-5-carboxylate reductase	EC:1.5.1.2	1
K00297	m MTHFR	methylenetetrahydrofolate reductase (NADPH)	EC:1.5.1.20	1
K13998	DHFR-TS	dihydrofolate reductase / thymidylate synthase	EC:1.5.1.3 2.1.1.45	1
K00288	MTHFD	methylenetetrahydrofolate dehydrogenase (NADP+) / methenyltetrahydrofolate cyclohydrolase / formyltetrahydrofolate synthetase	EC:1.5.1.5 3.5.4.9 6.3.4.3	1
K05577	ndhF	NAD(P)H-quinone oxidoreductase subunit 5	EC:1.6.5.3	1
K03943	NDUFV2	NADH dehydrogenase (ubiquinone) flavoprotein 2	EC:1.6.5.3 1.6.99.3	1
K03941	NDUFS8	NADH dehydrogenase (ubiquinone) Fe-S protein 8	EC:1.6.5.3 1.6.99.3	1
K00365	uaZ	urate oxidase	EC:1.7.3.3	1
K00383	GSR, gor	glutathione reductase (NADPH)	EC:1.8.1.7	1
K05906	PCYOX1, FCLY	prenylcysteine oxidase / farnesylcysteine lyase	EC:1.8.3.5 1.8.3.6	1
K05907	APR	adenylyl-sulfate reductase (glutathione)	EC:1.8.4.9	1
K00547	mmuM	homocysteine S-methyltransferase	EC:2.1.1.10	1
K00587	ICMT, STE14	protein-S-isoprenylcysteine O-methyltransferase	EC:2.1.1.100	1
K03428	chlM, bchM	magnesium-protoporphyrin O-methyltransferase	EC:2.1.1.11	1
K03183	ubiE	ubiquinone/menaquinone biosynthesis methyltransferase	EC:2.1.1.163 2.1.1.201	1
K06127	COQ5	ubiquinone biosynthesis methyltransferase	EC:2.1.1.201	1
K13230	BX7	2,4,7-trihydroxy-1,4-benzoxazin-3-one-glucoside 7-O-methyltransferase	EC:2.1.1.241	1
K14568	NEP1	rRNA small subunit pseudouridine methyltransferase Nep1	EC:2.1.1.260	1
K00565	RNMT	mRNA (guanine-N7-)-methyltransferase	EC:2.1.1.56	1
K05928	E2.1.1.95	tocopherol O-methyltransferase	EC:2.1.1.95	1
K00605	gcvT, AMT	aminomethyltransferase	EC:2.1.2.10	1
K00606	panB	3-methyl-2-oxobutanoate hydroxymethyltransferase	EC:2.1.2.11	1
K00601	E2.1.2.2	phosphoribosylglycinamide formyltransferase	EC:2.1.2.2	1
K00602	purH	phosphoribosylaminoimidazolecarboxamide formyltransferase / IMP cyclohydrolase	EC:2.1.2.3 3.5.4.10	1
K00611	OTC, argF, argI	ornithine carbamoyltransferase	EC:2.1.3.3	1
K05283	PIGW	phosphatidylinositol glycan, class W	EC:2.3.-.-	1
K14521	NAT10, KRE33	N-acetyltransferase 10	EC:2.3.1.-	1
K17212	CUS	bisdemethoxycurcumin synthase	EC:2.3.1.211	1
K04709	LAG1	Acyl-CoA-dependent ceramide synthase	EC:2.3.1.24	1
K00620	argJ	glutamate N-acetyltransferase / amino-acid N-acetyltransferase	EC:2.3.1.35 2.3.1.1	1
K00645	fabD	acyl-carrier-protein S-malonyltransferase	EC:2.3.1.39	1
K00655	plsC	1-acyl-sn-glycerol-3-phosphate acyltransferase	EC:2.3.1.51	1
K15406	WSD1	wax-ester synthase / diacylglycerol O-acyltransferase	EC:2.3.1.75 2.3.1.20	1
K15741	IMS3, MAM1	methylthioalkylmalate synthase 1	EC:2.3.3.-	1
K01647	CS, gltA	citrate synthase	EC:2.3.3.1	1
K13493	UGT76C1_2	cytokinin-N-glucosyltransferase	EC:2.4.1.-	1
K13496	UGT73C	UDP-glucosyl transferase 73C	EC:2.4.1.-	1
K06119	SQD2	sulfoquinovosyltransferase	EC:2.4.1.-	1
K07542	PIGV	phosphatidylinositol glycan, class V	EC:2.4.1.-	1
K11718	HUGT	UDP-glucose:glycoprotein glucosyltransferase	EC:2.4.1.-	1
K00726	MGAT1	alpha-1,3-mannosyl-glycoprotein beta-1,2-N-acetylglucosaminyltransferase	EC:2.4.1.101	1
K00729	ALG5	dolichyl-phosphate beta-glucosyltransferase	EC:2.4.1.117	1
K03844	ALG11	alpha-1,2-mannosyltransferase	EC:2.4.1.131	1
K13263	IF7GT	isoflavone 7-O-glucosyltransferase	EC:2.4.1.170	1
K03857	PIGA, GPI3	phosphatidylinositol glycan, class A	EC:2.4.1.198	1
K00703	glgA	starch synthase	EC:2.4.1.21	1
K03845	ALG3	alpha-1,3-mannosyltransferase	EC:2.4.1.258	1
K03846	ALG9	alpha-1,2-mannosyltransferase	EC:2.4.1.259 2.4.1.261	1
K03848	ALG6	alpha-1,3-glucosyltransferase	EC:2.4.1.267	1
K00721	DPM1	dolichol-phosphate mannosyltransferase	EC:2.4.1.83	1
K13421	UMPS	uridine monophosphate synthetase	EC:2.4.2.10 4.1.1.23	1
K00766	trpD	anthranilate phosphoribosyltransferase	EC:2.4.2.18	1
K00770	E2.4.2.24	1,4-beta-D-xylan synthase	EC:2.4.2.24	1
K00760	hprT, hpt, HPRT1	hypoxanthine phosphoribosyltransferase	EC:2.4.2.8	1
K14066	GPS	geranyl diphosphate synthase	EC:2.5.1.1	1
K13034	ATCYSC1	L-3-cyanoalanine synthase/ cysteine synthase	EC:2.5.1.47 4.4.1.9	1
K01626	aroF, aroG, aroH	3-deoxy-7-phosphoheptulonate synthase	EC:2.5.1.54	1
K00791	miaA, TRIT1	tRNA dimethylallyltransferase	EC:2.5.1.75	1
K00794	ribH, RIB4	6,7-dimethyl-8-ribityllumazine synthase	EC:2.5.1.78	1
K05356	SPS, sds	all-trans-nonaprenyl-diphosphate synthase	EC:2.5.1.84 2.5.1.85	1
K00818	argD	acetylornithine aminotransferase	EC:2.6.1.11	1
K00831	s PSAT1	phosphoserine aminotransferase	EC:2.6.1.52	1
K14264	BNA3	kynurenine aminotransferase	EC:2.6.1.7	1
K05285	PIGN	phosphatidylinositol glycan, class N	EC:2.7.-.-	1
K15892	FOLK	farnesol kinase	EC:2.7.1.-	1
K00919	ispE	4-diphosphocytidyl-2-C-methyl-D-erythritol kinase	EC:2.7.1.148	1
K00852	rbsK, RBKS	ribokinase	EC:2.7.1.15	1
K10572	IPPK	inositol-pentakisphosphate 2-kinase	EC:2.7.1.158	1
K00856	ADK	adenosine kinase	EC:2.7.1.20	1
K00857	tdk, TK	thymidine kinase	EC:2.7.1.21	1
K00863	DAK1, DAK2	dihydroxyacetone kinase	EC:2.7.1.29	1
K00869	MVK, mvaK1	mevalonate kinase	EC:2.7.1.36	1
K00872	thrB1	homoserine kinase	EC:2.7.1.39	1
K00847	scrK	fructokinase	EC:2.7.1.4	1
K00891	aroK, aroL	shikimate kinase	EC:2.7.1.71	1
K14399	CLP1, HERB	polyribonucleotide 5'-hydroxyl-kinase	EC:2.7.1.78	1
K00894	EKI	ethanolamine kinase	EC:2.7.1.82	1
K13420	FLS2	LRR receptor-like serine/threonine-protein kinase FLS2	EC:2.7.11.1	1
K13428	EFR	LRR receptor-like serine/threonine-protein kinase EFR	EC:2.7.11.1	1
K03097	CSNK2A	casein kinase II subunit alpha	EC:2.7.11.1	1
K06655	PHO85	negative regulator of the PHO system	EC:2.7.11.22	1
K00928	lysC	aspartate kinase	EC:2.7.2.4	1
K00930	argB	acetylglutamate kinase	EC:2.7.2.8	1
K13800	CMPK1, UMPK	UMP-CMP kinase	EC:2.7.4.- 2.7.4.14	1
K09903	pyrH	uridylate kinase	EC:2.7.4.22	1
K00949	thiN, TPK1, THI80	thiamine pyrophosphokinase	EC:2.7.6.2	1
K02685	PRI2	DNA primase large subunit	EC:2.7.7.-	1
K02684	PRI1	DNA primase small subunit	EC:2.7.7.-	1
K14168	CTU1, NCS6	cytoplasmic tRNA 2-thiolation protein 1	EC:2.7.7.-	1
K00965	galT, GALT	UDPglucose--hexose-1-phosphate uridylyltransferase	EC:2.7.7.12	1
K00968	PCYT1	choline-phosphate cytidylyltransferase	EC:2.7.7.15	1
K03514	PAPD5_7, TRF4	non-canonical poly(A) RNA polymerase PAPD5/7	EC:2.7.7.19	1
K03010	RPB2, POLR2B	DNA-directed RNA polymerase II subunit RPB2	EC:2.7.7.6	1
K03002	RPA2, POLR1B	DNA-directed RNA polymerase I subunit RPA2	EC:2.7.7.6	1
K00991	ispD	2-C-methyl-D-erythritol 4-phosphate cytidylyltransferase	EC:2.7.7.60	1
K02326	POLE3	DNA polymerase epsilon subunit 3	EC:2.7.7.7	1
K02325	POLE2	DNA polymerase epsilon subunit 2	EC:2.7.7.7	1
K02320	POLA1	DNA polymerase alpha subunit A	EC:2.7.7.7	1
K02335	DPO1, polA	DNA polymerase I	EC:2.7.7.7	1
K03512	POLL	DNA polymerase lambda	EC:2.7.7.7 4.2.99.-	1
K01001	ALG7	UDP-N-acetylglucosamine--dolichyl-phosphate N-acetylglucosaminephosphotransferase	EC:2.7.8.15	1
K00995	pgsA, PGS1	CDP-diacylglycerol--glycerol-3-phosphate 3-phosphatidyltransferase	EC:2.7.8.5	1
K01006	ppdK	pyruvate, orthophosphate dikinase	EC:2.7.9.1	1
K01012	bioB	biotin synthase	EC:2.8.1.6	1
K04487	iscS, NFS1	cysteine desulfurase	EC:2.8.1.7	1
K11717	sufS	cysteine desulfurase / selenocysteine lyase	EC:2.8.1.7 4.4.1.16	1
K13288	orn, R REXO2	oligoribonuclease	EC:3.1.-.-	1
K01057	PGLS, pgl, devB	6-phosphogluconolactonase	EC:3.1.1.31	1
K06129	LYPLA3	lysophospholipase III	EC:3.1.1.5	1
K06130	LYPLA2	lysophospholipase II	EC:3.1.1.5	1
K12591	RRP6, EXOSC10	exosome complex exonuclease RRP6	EC:3.1.13.-	1
K12585	DIS3, RRP44	exosome complex exonuclease DIS3/RRP44	EC:3.1.13.-	1
K12571	PAN2	PAB-dependent poly(A)-specific ribonuclease subunit 2	EC:3.1.13.4	1
K01070	frmB, fghA	S-formylglutathione hydrolase	EC:3.1.2.12	1
K10882	MMS4	crossover junction endonuclease EME1	EC:3.1.22.-	1
K03539	RPP1, RPP30	ribonuclease P/MRP protein subunit RPP1	EC:3.1.26.5	1
K01164	POP1	ribonuclease P/MRP protein subunit POP1	EC:3.1.26.5	1
K14403	CPSF3, YSH1	cleavage and polyadenylation specificity factor subunit 3	EC:3.1.27.-	1
K04716	SGPP1	sphingosine-1-phosphate phosphatase 1	EC:3.1.3.-	1
K14379	ACP5	tartrate-resistant acid phosphatase type 5	EC:3.1.3.2	1
K01079	s PSPH	phosphoserine phosphatase	EC:3.1.3.3	1
K01081	E3.1.3.5	5'-nucleotidase	EC:3.1.3.5	1
K15422	SAL	3'(2'), 5'-bisphosphate nucleotidase / inositol polyphosphate 1-phosphatase	EC:3.1.3.7 3.1.3.57	1
K06124	PHOSPHO1	phosphoethanolamine/phosphocholine phosphatase	EC:3.1.3.75	1
K16860	PLD3_4	phospholipase D3/4	EC:3.1.4.4	1
K16329	psuG	pseudouridine-5'-phosphate glycosidase	EC:3.2.-.-	1
K01177	E3.2.1.2	beta-amylase	EC:3.2.1.2	1
K01187	malZ	alpha-glucosidase	EC:3.2.1.20	1
K05349	bglX	beta-glucosidase	EC:3.2.1.21	1
K01190	lacZ	beta-galactosidase	EC:3.2.1.23	1
K01194	tr treF	alpha,alpha-trehalase	EC:3.2.1.28	1
K15923	AXY8, FUC95A, afcA	alpha-L-fucosidase 2	EC:3.2.1.51	1
K10801	MBD4	methyl-CpG-binding domain protein 4	EC:3.2.2.-	1
K03660	OGG1	N-glycosylase/DNA lyase	EC:3.2.2.- 4.2.99.18	1
K03652	MPG	DNA-3-methyladenine glycosylase	EC:3.2.2.21	1
K03648	UNG, UDG	uracil-DNA glycosylase	EC:3.2.2.27	1
K01240	URH1	uridine nucleosidase	EC:3.2.2.3	1
K01254	LTA4H	leukotriene-A4 hydrolase	EC:3.3.2.6	1
K12947	SPCS2, SPC2	signal peptidase complex subunit 2	EC:3.4.-.-	1
K01256	pepN	aminopeptidase N	EC:3.4.11.2	1
K01259	pip	proline iminopeptidase	EC:3.4.11.5	1
K08653	MBTPS1	membrane-bound transcription factor site-1 protease	EC:3.4.21.112	1
K11863	ATXN3, MJD	Ataxin-3	EC:3.4.22.-	1
K07765	MBTPS2	S2P endopeptidase	EC:3.4.24.85	1
K02739	PSMB7	20S proteasome subunit beta 2	EC:3.4.25.1	1
K02737	PSMB5	20S proteasome subunit beta 5	EC:3.4.25.1	1
K02736	PSMB4	20S proteasome subunit beta 7	EC:3.4.25.1	1
K02734	PSMB2	20S proteasome subunit beta 4	EC:3.4.25.1	1
K02731	PSMA7	20S proteasome subunit alpha 4	EC:3.4.25.1	1
K02726	PSMA2	20S proteasome subunit alpha 2	EC:3.4.25.1	1
K04711	YDC1	dihydroceramidase	EC:3.5.1.-	1
K01433	purU	formyltetrahydrofolate deformylase	EC:3.5.1.10	1
K01438	argE	acetylornithine deacetylase	EC:3.5.1.16	1
K01440	PNC1	nicotinamidase	EC:3.5.1.19	1
K01444	AGA, aspG	N4-(beta-N-acetylglucosaminyl)-L-asparaginase	EC:3.5.1.26	1
K01455	E3.5.1.49	formamidase	EC:3.5.1.49	1
K01427	URE	urease	EC:3.5.1.5	1
K12251	aguB	N-carbamoylputrescine amidase	EC:3.5.1.53	1
K01431	UPB1	beta-ureidopropionase	EC:3.5.1.6	1
K01464	DPYS, dht, hydA	dihydropyrimidinase	EC:3.5.2.2	1
K01466	allB	allantoinase	EC:3.5.2.5	1
K01469	E3.5.2.9	5-oxoprolinase (ATP-hydrolysing)	EC:3.5.2.9	1
K14977	ylbA, UGHY	(S)-ureidoglycine aminohydrolase	EC:3.5.3.26	1
K11752	ribD	diaminohydroxyphosphoribosylaminopyrimidine deaminase / 5-amino-6-(5-phosphoribosylamino)uracil reductase	EC:3.5.4.26 1.1.1.193	1
K10866	RAD50	DNA repair protein RAD50	EC:3.6.-.-	1
K14539	LSG1	large subunit GTPase 1	EC:3.6.1.-	1
K16904	DCTPP1	dCTP diphosphatase	EC:3.6.1.12	1
K06928	NTPCR	nucleoside-triphosphatase	EC:3.6.1.15	1
K03426	NUDT12, nudC	NAD+ diphosphatase	EC:3.6.1.22	1
K01520	dut, DUT	dUTP pyrophosphatase	EC:3.6.1.23	1
K07252	E3.6.1.43	dolichyldiphosphatase	EC:3.6.1.43	1
K01510	ENTPD1_3_8	apyrase	EC:3.6.1.5	1
K01512	acyP	acylphosphatase	EC:3.6.1.7	1
K10844	XPD	DNA excision repair protein ERCC-2	EC:3.6.4.12	1
K10843	XPB	DNA excision repair protein ERCC-3	EC:3.6.4.12	1
K02210	MCM7, CDC47	DNA replication licensing factor MCM7	EC:3.6.4.12	1
K12812	UAP56, BAT1, SUB2	ATP-dependent RNA helicase UAP56/SUB2	EC:3.6.4.13	1
K12854	SNRNP200, BRR2	pre-mRNA-splicing helicase BRR2	EC:3.6.4.13	1
K12598	MTR4, SKIV2L2	ATP-dependent RNA helicase DOB1	EC:3.6.4.13	1
K13025	FAL1	ATP-dependent RNA helicase	EC:3.6.4.13	1
K12820	DHX15, PRP43	pre-mRNA-splicing factor ATP-dependent RNA helicase DHX15/PRP43	EC:3.6.4.13	1
K14536	RIA1	ribosome assembly protein 1	EC:3.6.5.-	1
K01555	FAH, fahA	fumarylacetoacetase	EC:3.7.1.2	1
K11808	ADE2	phosphoribosylaminoimidazole carboxylase	EC:4.1.1.21	1
K01590	hdc, HDC	histidine decarboxylase	EC:4.1.1.22	1
K01592	E4.1.1.25	tyrosine decarboxylase	EC:4.1.1.25	1
K01599	h UROD	uroporphyrinogen decarboxylase	EC:4.1.1.37	1
K01578	MLYCD	malonyl-CoA decarboxylase	EC:4.1.1.9	1
K01661	menB	naphthoate synthase	EC:4.1.3.36	1
K15404	K15404, CER1	aldehyde decarbonylase	EC:4.1.99.5	1
K16054	DEP1	methylthioribulose 1-phosphate dehydratase / enolase-phosphatase E1	EC:4.2.1.109 3.1.3.77	1
K06001	trpB	tryptophan synthase beta chain	EC:4.2.1.20	1
K01703	leuC	3-isopropylmalate/(R)-2-methylmalate dehydratase large subunit	EC:4.2.1.33 4.2.1.35	1
K01710	rfbB, rffG	dTDP-glucose 4,6-dehydratase	EC:4.2.1.46	1
K01687	ilvD	dihydroxy-acid dehydratase	EC:4.2.1.9	1
K05359	ADT, PDT	arogenate/prephenate dehydratase	EC:4.2.1.91 4.2.1.51	1
K14184	TPS21	alpha-humulene/beta-caryophyllene synthase	EC:4.2.3.- 4.2.3.57	1
K01733	thrC	threonine synthase	EC:4.2.3.1	1
K12467	E4.2.3.15	myrcene/ocimene synthase	EC:4.2.3.15	1
K15803	GERD	(-)-germacrene D synthase	EC:4.2.3.22 4.2.3.75	1
K15086	TPS14	(3S)-linalool synthase	EC:4.2.3.25	1
K14038	KSL5	ent-pimara-8(14),15-diene synthase	EC:4.2.3.30	1
K01735	aroB	3-dehydroquinate synthase	EC:4.2.3.4	1
K13830	ARO1	pentafunctional AROM polypeptide	EC:4.2.3.4 4.2.1.10 1.1.1.25 2.7.1.71 2.5.1.19	1
K14174	TPS10	beta-farnesene synthase	EC:4.2.3.47	1
K14181	TPS1	valencene/7-epi-alpha-selinene synthase	EC:4.2.3.73 4.2.3.86	1
K10772	APEX2	AP endonuclease 2	EC:4.2.99.18	1
K17989	SDS, SDH, CHA1	L-serine/L-threonine ammonia-lyase	EC:4.3.1.17 4.3.1.19	1
K01755	argH, ASL	argininosuccinate lyase	EC:4.3.2.1	1
K08681	pdxT, pdx2	5'-phosphate synthase pdxT subunit	EC:4.3.3.6	1
K01772	h FECH	ferrochelatase	EC:4.99.1.1	1
K11868	CYP71A13	indoleacetaldoxime dehydratase	EC:4.99.1.6	1
K12451	UER1	3,5-epimerase/4-reductase	EC:5.1.3.- 1.1.1.-	1
K01783	rp RPE	ribulose-phosphate 3-epimerase	EC:5.1.3.1	1
K01785	galM, GALM	aldose 1-epimerase	EC:5.1.3.3	1
K10598	PPIL2, CYC4, CHP60	peptidyl-prolyl cis-trans isomerase-like 2	EC:5.2.1.8	1
K01814	hisA	phosphoribosylformimino-5-aminoimidazole carboxamide ribotide isomerase	EC:5.3.1.16	1
K08963	mtnA	methylthioribose-1-phosphate isomerase	EC:5.3.1.23	1
K01809	manA, MPI	mannose-6-phosphate isomerase	EC:5.3.1.8	1
K01824	EBP	cholestenol delta-isomerase	EC:5.3.3.5	1
K10525	aoc	allene oxide cyclase	EC:5.3.99.6	1
K01834	PGAM, gpmA	2,3-bisphosphoglycerate-dependent phosphoglycerate mutase	EC:5.4.2.11	1
K15634	gpmB	probable phosphoglycerate mutase	EC:5.4.2.12	1
K17497	PMM	phosphomannomutase	EC:5.4.2.8	1
K02552	menF	menaquinone-specific isochorismate synthase	EC:5.4.4.2	1
K14759	PHYLLO	isochorismate synthase / 2-succinyl-5-enolpyruvyl-6-hydroxy-3-cyclohexene-1-carboxylate synthase / 2-succinyl-6-hydroxy-2,4-cyclohexadiene-1-carboxylate synthase / O-succinylbenzoate synthase	EC:5.4.4.2 2.2.1.9 4.2.99.20 4.2.1.113	1
K15822	CAMS1, LUP3	camelliol C synthase	EC:5.4.99.38	1
K16207	MRN1	marneral synthase	EC:5.4.99.53	1
K16206	BARS1	baruol synthase	EC:5.4.99.57	1
K01875	SARS, serS	seryl-tRNA synthetase	EC:6.1.1.11	1
K01876	DARS, aspS	aspartyl-tRNA synthetase	EC:6.1.1.12	1
K01881	PARS, proS	prolyl-tRNA synthetase	EC:6.1.1.15	1
K01887	RARS, argS	arginyl-tRNA synthetase	EC:6.1.1.19	1
K01867	WARS, trpS	tryptophanyl-tRNA synthetase	EC:6.1.1.2	1
K01889	FARSA, pheS	phenylalanyl-tRNA synthetase alpha chain	EC:6.1.1.20	1
K01872	AARS, alaS	alanyl-tRNA synthetase	EC:6.1.1.7	1
K01895	ACSS, acs	acetyl-CoA synthetase	EC:6.2.1.1	1
K01915	glnA, GLUL	glutamine synthetase	EC:6.3.1.2	1
K01918	panC	pantoate--beta-alanine ligase	EC:6.3.2.1	1
K10684	UBL SAE1	ubiquitin-like 1-activating enzyme E1 A	EC:6.3.2.19	1
K10685	UBL SA UBA2	ubiquitin-like 1-activating enzyme E1 B	EC:6.3.2.19	1
K10589	UBE3C	ubiquitin-protein ligase E3 C	EC:6.3.2.19	1
K10597	UB UFD2	ubiquitin conjugation factor E4 B	EC:6.3.2.19	1
K06688	UB UBC11	ubiquitin-conjugating enzyme E2 C	EC:6.3.2.19	1
K10686	UB UBA3	ubiquitin-activating enzyme E1 C	EC:6.3.2.19	1
K10578	UB NCUB UBC6	ubiquitin-conjugating enzyme E2 J1	EC:6.3.2.19	1
K09561	STUB1, CHIP	STIP1 homology and U-box containing protein 1	EC:6.3.2.19	1
K10599	PRPF19, PRP19	pre-mRNA-processing factor 19	EC:6.3.2.19	1
K10661	MARCH6, DOA10	E3 ubiquitin-protein ligase MARCH6	EC:6.3.2.19	1
K10643	CNOT4, NOT4, MOT2	CCR4-NOT transcription complex subunit 4	EC:6.3.2.19	1
K08343	ATG3	ubiquitin-like-conjugating enzyme ATG3	EC:6.3.2.19	1
K10636	AMFR, GP78	autocrine motility factor receptor	EC:6.3.2.19	1
K01919	gshA	glutamate--cysteine ligase	EC:6.3.2.2	1
K01920	gshB, GSS	glutathione synthase	EC:6.3.2.3	1
K01951	guaA, GMPS	GMP synthase (glutamine-hydrolysing)	EC:6.3.5.2	1
K01952	purL, PFAS	phosphoribosylformylglycinamidine synthase	EC:6.3.5.3	1
K01955	carB, CPA2	carbamoyl-phosphate synthase large subunit	EC:6.3.5.5	1
K01956	carA, CPA1	carbamoyl-phosphate synthase small subunit	EC:6.3.5.5	1
K01961	accC	acetyl-CoA carboxylase, biotin carboxylase subunit	EC:6.4.1.2 6.3.4.14	1
K11262	ACAC	acetyl-CoA carboxylase / biotin carboxylase	EC:6.4.1.2 6.3.4.14	1
K01969	E6.4.1.4B	3-methylcrotonyl-CoA carboxylase beta subunit	EC:6.4.1.4	1
K01968	E6.4.1.4A	3-methylcrotonyl-CoA carboxylase alpha subunit	EC:6.4.1.4	1
K03405	chlI, bchI	magnesium chelatase subunit I	EC:6.6.1.1	1
K03404	chlD, bchD	magnesium chelatase subunit D	EC:6.6.1.1	1
K10884	XRCC6, KU70, G22P1	ATP-dependent DNA helicase 2 subunit 1		1
K10885	XRCC5, KU80, G22P2	ATP-dependent DNA helicase 2 subunit 2		1
K10880	XRCC3	DNA-repair protein XRCC3		1
K10879	XRCC2	DNA-repair protein XRCC2		1
K14289	XPO5	exportin-5		1
K10838	XPC	xeroderma pigmentosum group C-complementing protein		1
K14962	WDR82, SWD2, CPS35	COMPASS component SWD2		1
K08493	VTI1	vesicle transport through interaction with t-SNAREs 1		1
K12479	VPS45	vacuolar protein sorting-associated protein 45		1
K12196	VPS4	vacuolar protein-sorting-associated protein 4		1
K12190	VPS36, EAP45	ESCRT-II complex subunit VPS36		1
K12184	VPS28	ESCRT-I complex subunit VPS28		1
K12193	VPS24, CHMP3	charged multivesicular body protein 3		1
K14557	UTP6	U3 small nucleolar RNA-associated protein 6		1
K14548	UTP4, CIRH1A	U3 small nucleolar RNA-associated protein 4		1
K14566	UTP24, FCF1	U3 small nucleolar RNA-associated protein 24		1
K14554	UTP21, WDR36	U3 small nucleolar RNA-associated protein 21		1
K14553	UTP18	U3 small nucleolar RNA-associated protein 18		1
K14567	UTP14	U3 small nucleolar RNA-associated protein 14		1
K14555	UTP13, TBL3	U3 small nucleolar RNA-associated protein 13		1
K12847	USP39, SAD1	U4/U6.U5 tri-snRNP-associated protein 2		1
K14327	UPF2, RENT2	regulator of nonsense transcripts 2		1
K14016	UFD1	ubiquitin fusion degradation protein 1		1
K14011	UBXN6, UBXD1	UBX domain-containing protein 6		1
K14485	TIR1	transport inhibitor response 1		1
K13175	THOC6	THO complex subunit 6		1
K12879	THOC2	THO complex subunit 2		1
K12878	THOC1	THO complex subunit 1		1
K03144	TFIIH4, GTF2H4, TFB2	transcription initiation factor TFIIH subunit 4		1
K03143	TFIIH3, GTF2H3, TFB4	transcription initiation factor TFIIH subunit 3		1
K03142	TFIIH2, GTF2H2, SSL1	transcription initiation factor TFIIH subunit 2		1
K03138	TFIIF1, GTF2F1, TFG1	transcription initiation factor TFIIF subunit alpha		1
K03123	TFIIA2, GTF2A2, TOA2	transcription initiation factor TFIIA small subunit		1
K16221	TCP21, CHE	transcription factor TCP21 (protein CCA1 HIKING EXPEDITION)		1
K12824	TC CA150	transcription elongation regulator 1		1
K03133	TAF9B, TAF9	transcription initiation factor TFIID subunit 9B		1
K14649	TAF8	transcription initiation factor TFIID subunit 8		1
K03130	TAF5	transcription initiation factor TFIID subunit 5		1
K03135	TAF11	transcription initiation factor TFIID subunit 11		1
K08506	SYP7	syntaxin of plants SYP7		1
K12867	SYF1, XAB2	pre-mRNA-splicing factor SYF1		1
K09202	SWI5	regulatory protein SWI5		1
K08501	STX8	syntaxin 8		1
K08492	STX18	syntaxin 18		1
K08489	STX16	syntaxin 16		1
K13137	STRAP, UNRIP	serine-threonine kinase receptor-associated protein		1
K13250	SSR2	translocon-associated protein subunit beta		1
K12272	SRPRB, SRP102	signal recognition particle receptor subunit beta		1
K03108	SRP72	signal recognition particle subunit SRP72		1
K03107	SRP68	signal recognition particle subunit SRP68		1
K03106	SRP54, ffh	signal recognition particle subunit SRP54		1
K12842	SR140	U2-associated protein SR140		1
K16240	SPA1	protein suppressor of PHYA-105 1		1
K06063	SNW1, SKIIP, SKIP	SNW domain-containing protein 1		1
K13151	SNUPN, RNUT1	snurportin-1		1
K11088	SNRPD3, SMD3	small nuclear ribonucleoprotein D3		1
K12188	SNF8, EAP30	ESCRT-II complex subunit VPS22		1
K03875	SKP2, FBXL1	F-box and leucine-rich repeat protein 1 (S-phase kinase-associated protein 2)		1
K03094	SKP1, CBF3D	S-phase kinase-associated protein 1		1
K13130	SIP1, GEMIN2	survival of motor neuron protein-interacting protein 1		1
K14001	SIL1, SLS1	nucleotide exchange factor SIL1		1
K08505	SFT1	protein transport protein SFT1		1
K12896	SFRS7	splicing factor, arginine/serine-rich 7		1
K12831	SF3B4, SAP49	splicing factor 3B subunit 4		1
K12833	SF3B14	pre-mRNA branch site protein p14		1
K12825	SF3A1, SAP114	splicing factor 3A subunit 1		1
K12275	SEC62	translocation protein SEC62		1
K10956	SEC61A	protein transport protein SEC61 subunit alpha		1
K14004	SEC13	protein transport protein SEC13		1
K14026	S SEL1L	SEL1 protein		1
K12590	RRP46, EXOSC5	exosome complex component RRP46		1
K12586	RRP43, OIP2	exosome complex component RRP43		1
K12589	RRP42, EXOSC7	exosome complex component RRP42		1
K03681	RRP40, EXOSC3	exosome complex component RRP40		1
K03679	RRP4, EXOSC2	exosome complex component RRP4		1
K02998	RP-SA RPSA	small subunit ribosomal protein SAe		1
K02996	RP-S9, MRPS9, rpsI	small subunit ribosomal protein S9		1
K02988	RP-S5, MRPS5, rpsE	small subunit ribosomal protein S5		1
K02975	RP-S25 RPS25	small subunit ribosomal protein S25e		1
K02981	RP-S2 RPS2	small subunit ribosomal protein S2e		1
K13459	RPS2	disease resistance protein RPS2		1
K02961	RP-S17, MRPS17, rpsQ	small subunit ribosomal protein S17		1
K02962	RP-S17 RPS17	small subunit ribosomal protein S17e		1
K02958	RP-S15 RPS15	small subunit ribosomal protein S15e		1
K02938	RP-L8 RPL8	large subunit ribosomal protein L8e		1
K02933	RP-L6, MRPL6, rplF	large subunit ribosomal protein L6		1
K02934	RP-L6 RPL6	large subunit ribosomal protein L6e		1
K02931	RP-L5, MRPL5, rplE	large subunit ribosomal protein L5		1
K02932	RP-L5 RPL5	large subunit ribosomal protein L5e		1
K02926	RP-L4, MRPL4, rplD	large subunit ribosomal protein L4		1
K02918	RP-L35 RPL35	large subunit ribosomal protein L35e		1
K02911	RP-L32, MRPL32, rpmF	large subunit ribosomal protein L32		1
K02902	RP-L28, MRPL28, rpmB	large subunit ribosomal protein L28		1
K02899	RP-L27, MRPL27, rpmA	large subunit ribosomal protein L27		1
K02895	RP-L24, MRPL24, rplX	large subunit ribosomal protein L24		1
K02892	RP-L23, MRPL23, rplW	large subunit ribosomal protein L23		1
K02884	RP-L19, MRPL19, rplS	large subunit ribosomal protein L19		1
K02874	RP-L14, MRPL14, rplN	large subunit ribosomal protein L14		1
K02868	RP-L11 RPL11	large subunit ribosomal protein L11e		1
K02865	RP-L10A RPL10A	large subunit ribosomal protein L10Ae		1
K03027	RPC40, POLR1C	DNA-directed RNA polymerases I and III subunit RPAC1		1
K14721	RPC37, POLR3E	DNA-directed RNA polymerase III subunit RPC5		1
K03016	RPB8, POLR2H	DNA-directed RNA polymerases I, II, and III subunit RPABC3		1
K03015	RPB7, POLR2G	DNA-directed RNA polymerase II subunit RPB7		1
K03013	RPB5, POLR2E	DNA-directed RNA polymerases I, II, and III subunit RPABC1		1
K03012	RPB4, POLR2D	DNA-directed RNA polymerase II subunit RPB4		1
K03011	RPB3, POLR2C	DNA-directed RNA polymerase II subunit RPB3		1
K03005	RPA49, POLR1E	DNA-directed RNA polymerase I subunit RPA49		1
K10745	RNASEH2C	ribonuclease H2 subunit C		1
K10754	RFC1	replication factor C subunit 1		1
K10739	RFA2, RPA2	replication factor A2		1
K11108	RCL1	RNA 3'-terminal phosphate cyclase-like protein		1
K03868	RBX1, ROC1	RING-box protein 1		1
K10871	RAD51L3, RAD51D	RAD51-like protein 3		1
K07889	RAB5C	Ras-related protein Rab-5C		1
K15628	PXA	ATP-binding cassette, subfamily D (ALD), peroxisomal long-chain fatty acid import protein		1
K14558	PWP2, UTP1	periodic tryptophan protein 2		1
K06700	PSMF1	proteasome inhibitor subunit 1 (PI31)		1
K06699	PSME4	proteasome activator subunit 4		1
K03031	PSMD8, RPN12	26S proteasome regulatory subunit N12		1
K03037	PSMD6, RPN7	26S proteasome regulatory subunit N7		1
K03028	PSMD2, RPN1	26S proteasome regulatory subunit N1		1
K03035	PSMD12, RPN5	26S proteasome regulatory subunit N5		1
K03032	PSMD1, RPN2	26S proteasome regulatory subunit N2		1
K03064	PSMC6, RPT4	26S proteasome regulatory subunit T4		1
K08901	psbQ	photosystem II oxygen-evolving enhancer protein 3		1
K02717	psbP	photosystem II oxygen-evolving enhancer protein 2		1
K02703	psbA	photosystem II P680 reaction center D1 protein		1
K12856	PRPF8, PRP8	pre-mRNA-processing factor 8		1
K12844	PRPF31	U4/U6 small nuclear ribonucleoprotein PRP31		1
K12843	PRPF3, PRP3	U4/U6 small nuclear ribonucleoprotein PRP3		1
K12817	PRPF18, PRP18	pre-mRNA-splicing factor 18		1
K08288	PRKCSH	protein kinase C substrate 80K-H		1
K13449	PR1	pathogenesis-related protein 1		1
K11599	POMP, UMP1	proteasome maturation protein		1
K02328	POLD2	DNA polymerase delta subunit 2		1
K10858	PMS2	DNA mismatch repair protein PMS2		1
K14018	PLAA, DOA1, UFD3	phospholipase A-2-activating protein		1
K07541	PIGX	phosphatidylinositol glycan, class X		1
K03860	PIGQ, GPI1	phosphatidylinositol glycan, class Q		1
K03861	PIGP, GPI19, DSCR5	phosphatidylinositol glycan, class P		1
K03859	PIGC, GPI2	phosphatidylinositol glycan, class C		1
K15542	PFS2	polyadenylation factor subunit 2		1
K13336	PEX3	peroxin-3		1
K13337	PEX19	peroxin-19		1
K13346	PEX10	peroxin-10		1
K13338	PEX1	peroxin-1		1
K02638	petE	plastocyanin		1
K13342	P PXR1	peroxin-5		1
K13339	P PXAAA1	peroxin-6		1
K13341	P PTS2R	peroxin-7		1
K10088	OS9	protein OS-9		1
K02607	ORC5	origin recognition complex subunit 5		1
K02604	ORC2	origin recognition complex subunit 2		1
K14309	NUP93	nuclear pore complex protein Nup93		1
K14318	NUP88	nuclear pore complex protein Nup88		1
K14304	NUP85	nuclear pore complex protein Nup85		1
K14308	NUP54	nuclear pore complex protein Nup54		1
K14310	NUP205	nuclear pore complex protein Nup205		1
K14311	NUP188	nuclear pore complex protein Nup188		1
K14303	NUP160	nuclear pore complex protein Nup160		1
K14312	NUP155	nuclear pore complex protein Nup155		1
K14538	NUG1, GNL3	nuclear GTP-binding protein		1
K14565	NOP58	nucleolar protein 58		1
K14573	NOP4, RBM28	nucleolar protein 4		1
K07562	NMD3	nonsense-mediated mRNA decay protein 3		1
K03949	NDUFA5	NADH dehydrogenase (ubiquinone) 1 alpha subcomplex subunit 5		1
K03946	NDUFA2	NADH dehydrogenase (ubiquinone) 1 alpha subcomplex subunit 2		1
K14315	NDC1, TMEM48	nucleoporin NDC1		1
K12883	NCBP2, CBP20	nuclear cap-binding protein subunit 2		1
K12882	NCBP1, CBP80	nuclear cap-binding protein subunit 1		1
K14552	NAN1, UTP17, WDR75	NET1-associated nuclear protein 1 (U3 small nucleolar RNA-associated protein 17)		1
K12587	MTR3, EXOSC6	exosome complex component MTR3		1
K08736	MSH3	DNA mismatch repair protein MSH3		1
K08735	MSH2	DNA mismatch repair protein MSH2		1
K14559	MPP10	U3 small nucleolar RNA-associated protein MPP10		1
K11996	MOCS3, UBA4, moeB	adenylyltransferase and sulfurtransferase		1
K06685	MOB1, Mats	MOB kinase activator 1		1
K08739	MLH3	DNA mismatch repair protein MLH3		1
K08734	MLH1	DNA mismatch repair protein MLH1		1
K12133	LHY	MYB-related transcription factor LHY		1
K08916	LHCB5	light-harvesting complex II chlorophyll a/b binding protein 5		1
K08913	LHCB2	light-harvesting complex II chlorophyll a/b binding protein 2		1
K08910	LHCA4	light-harvesting complex I chlorophyll a/b binding protein 4		1
K08909	LHCA3	light-harvesting complex I chlorophyll a/b binding protein 3		1
K03250	INT6	translation initiation factor 3 subunit E		1
K09486	HYOU1	hypoxia up-regulated 1		1
K09562	HSPBP1	hsp70-interacting protein		1
K09833	HPT, TPT	homogenitisate phytyltransferase		1
K15919	HPR2	hydroxypyruvate reductase 2		1
K15893	HPR1	hydroxypyruvate reductase 1		1
K10802	HMGB1	high mobility group protein B1		1
K03267	GSPT	peptide chain release factor subunit 3		1
K08495	GOSR1, GOS1	golgi SNAP receptor complex member 1		1
K05289	GAA1	glycosylphosphatidylinositol transamidase		1
K12116	FKF1	flavin-binding kelch repeat F-box protein 1		1
K14517	ERF2	ethylene-responsive transcription factor 2		1
K10849	ERCC1	DNA excision repair protein ERCC-1		1
K03262	EIF5	translation initiation factor 5		1
K03246	EIF3I	translation initiation factor 3 subunit I		1
K03247	EIF3H	translation initiation factor 3 subunit H		1
K03248	EIF3G	translation initiation factor 3 subunit G		1
K03251	EIF3D	translation initiation factor 3 subunit D		1
K03253	EIF3B	translation initiation factor 3 subunit B		1
K03240	EIF2B5	translation initiation factor eIF-2B subunit epsilon		1
K03680	EIF2B4	translation initiation factor eIF-2B subunit delta		1
K12852	EFTUD2	116 kDa U5 small nuclear ribonucleoprotein component		1
K10084	EDEM1	ER degradation enhancer, mannosidase alpha-like 1		1
K04043	dnaK	molecular chaperone DnaK		1
K09518	DNAJB12	DnaJ homolog subfamily B member 12		1
K10571	DET1	de-etiolated-1		1
K10140	DDB2	DNA damage-binding protein 2		1
K09832	CYP710A	cytochrome P450, family 710, subfamily A		1
K05749	CYFIP	cytoplasmic FMR1 interacting protein		1
K14505	CYCD3	cyclin D3, plant		1
K00413	CYC1, CYT1, petC	ubiquinol-cytochrome c reductase cytochrome c1 subunit		1
K08738	CYC	cytochrome c		1
K14169	CTU2, NCS2	cytoplasmic tRNA 2-thiolation protein 2		1
K12864	CTNNBL1	beta-catenin-like protein 1		1
K14407	CSTF2, RNA15	cleavage stimulation factor subunit 2		1
K14406	CSTF1	cleavage stimulation factor subunit 1		1
K07573	CSL4, EXOSC1	exosome complex component CSL4		1
K02267	COX6B	cytochrome c oxidase subunit 6b		1
K02265	COX5B	cytochrome c oxidase subunit 5b		1
K02259	COX15	cytochrome c oxidase assembly protein subunit 15		1
K12607	CNOT10	CCR4-NOT transcription complex subunit 10		1
K12604	CNOT1, NOT1	CCR4-NOT transcription complex subunit 1		1
K05019	CLNS1A	chloride channel, nucleotide-sensitive, 1A		1
K10570	CKN1, CSA	DNA excision repair protein ERCC-8		1
K12198	CHMP5, VPS60	charged multivesicular body protein 5		1
K12194	CHMP4, SNF7, VPS32	charged multivesicular body protein 4		1
K06628	CDC45	cell division control protein 45		1
K12816	CDC40, PRP17	pre-mRNA-processing factor 17		1
K12592	C1D, LRP1	exosome complex protein LRP1		1
K14569	BMS1	ribosome biogenesis protein BMS1		1
K12861	BCAS2	pre-mRNA-splicing factor SPF27		1
K02108	ATPF0A, atpB	F-type H+-transporting ATPase subunit a		1
K02153	ATP ATP6H	V-type H+-transporting ATPase subunit e		1
K02148	ATP ATP6C	V-type H+-transporting ATPase subunit C		1
K02137	ATP ATP5O, ATP5	F-type H+-transporting ATPase subunit O		1
K17890	ATG16L	autophagy-related protein 16, animal type		1
K12493	ARFGAP2_3	ADP-ribosylation factor GTPase-activating protein 2/3		1
K12874	AQR	intron-binding protein aquarius		1
K03355	APC8, CDC23	anaphase-promoting complex subunit 8		1
K03353	APC6, CDC16	anaphase-promoting complex subunit 6		1
K03352	APC5	anaphase-promoting complex subunit 5		1
K03351	APC4	anaphase-promoting complex subunit 4		1
K03349	APC2	anaphase-promoting complex subunit 2		1
K11827	AP2S1	AP-2 complex subunit sigma-1		1
K12597	AIR1_2	protein AIR1/2		1
K08711	ABCG2.PDR	ATP-binding cassette, subfamily G (WHITE), member 2, PDR		1
